# Supplementary material for: SBAR improves communication and safety climate and decreases incident reports due to communication errors in an anaesthetic clinic: a prospective intervention study
Source: PubMed Central journal article supplement — BMJ Open. 2014 Jan 21;4(1):e004268. doi: 10.1136/bmjopen-2013-004268 (PMC3902348; doi:10.1136/bmjopen-2013-004268), 2014-01-21
Supplement: bmjopen-2013-004268.draft_revisions.pdf [file bmjopen-2013-004268.draft_revisions.pdf]

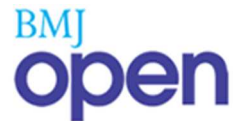

**SBAR improves communication and safety climate and decreases incident reports due to communication errors in an anaesthetic clinic: a prospective intervention study**

|                                 |                                                                                                                                                                                                                                                                                                                                                                                                                                                                                                                                                                                  |
|---------------------------------|----------------------------------------------------------------------------------------------------------------------------------------------------------------------------------------------------------------------------------------------------------------------------------------------------------------------------------------------------------------------------------------------------------------------------------------------------------------------------------------------------------------------------------------------------------------------------------|
| Journal:                        | <i>BMJ Open</i>                                                                                                                                                                                                                                                                                                                                                                                                                                                                                                                                                                  |
| Manuscript ID:                  | bmjopen-2013-004268                                                                                                                                                                                                                                                                                                                                                                                                                                                                                                                                                              |
| Article Type:                   | Research                                                                                                                                                                                                                                                                                                                                                                                                                                                                                                                                                                         |
| Date Submitted by the Author:   | 16-Oct-2013                                                                                                                                                                                                                                                                                                                                                                                                                                                                                                                                                                      |
| Complete List of Authors:       | Randmaa, Maria; Faculty of Health and Occupational Studies, Department of Health and Caring Sciences; County Council of Gävleborg, Department of Anaesthesia<br>Mårtensson, Gunilla; University of Gävle, Faculty of Health and Occupational Studies; Uppsala University, Department of Public Health and Caring Sciences<br>Leo Swenne, Christine; Uppsala University, Department of Public Health and Caring Sciences<br>Engström, Maria; University of Gävle, Faculty of Health and Occupational Studies; Uppsala University, Department of Public Health and Caring Sciences |
| <b>Primary Subject Heading</b>: | Communication                                                                                                                                                                                                                                                                                                                                                                                                                                                                                                                                                                    |
| Secondary Subject Heading:      | Anaesthesia                                                                                                                                                                                                                                                                                                                                                                                                                                                                                                                                                                      |
| Keywords:                       | Adult anaesthesia < ANAESTHETICS, Adult intensive & critical care < ANAESTHETICS, Health & safety < HEALTH SERVICES ADMINISTRATION & MANAGEMENT                                                                                                                                                                                                                                                                                                                                                                                                                                  |
|                                 |                                                                                                                                                                                                                                                                                                                                                                                                                                                                                                                                                                                  |

SCHOLARONE™  
Manuscripts

1  
2  
3 **SBAR improves communication and safety climate and decreases incident**  
4  
5 **reports due to communication errors in an anaesthetic clinic: a prospective**  
6  
7 **intervention study**  
8  
9

10  
11  
12 Maria Randmaa<sup>1,2,3\*</sup>, Gunilla Mårtensson<sup>1,3</sup>, Christine Leo Swenne<sup>3</sup>, Maria Engström<sup>1,3</sup>

13  
14 1) Faculty of Health and Occupational Studies, University of Gävle, Gävle, Sweden

15  
16 2) Department of Anaesthesia, County Council of Gävleborg, Sweden

17  
18 3) Department of Public Health and Caring Sciences, Uppsala University, Uppsala, Sweden  
19

20  
21 \*Corresponding author;

22  
23 Maria Randmaa, Faculty of Health and Occupational Studies, University of Gävle, S-801 76

24  
25 Gävle, Sweden

26  
27 E-mail: [maaraa@hig.se](mailto:maaraa@hig.se)  
28  
29  
30  
31  
32  
33  
34  
35  
36  
37  
38  
39  
40  
41  
42  
43  
44  
45  
46  
47  
48  
49  
50  
51  
52  
53  
54  
55  
56  
57  
58  
59  
60

**Word count:** 3999 words including figure and tables

**Keywords:** Anaesthetic clinic, Communication, Incident reports, Safety attitudes, SBAR

## ABSTRACT

**Objectives:** We aimed to examine staff members' perceptions of communication within and between different professions, safety attitudes and psychological empowerment, prior to and after implementation of the communication tool SBAR at an anaesthetic clinic. The aim was also to study whether there was any change in the proportion of incident reports caused by communication errors.

**Design:** A prospective intervention study with comparison group using pre- and post-assessments. Questionnaire data were collected from staff in an intervention (n=100) and a comparison group (n=69) at the anaesthetic clinic in two hospitals prior to (2011) and after (2012) implementation of SBAR. The proportion of incident reports due to communication errors was calculated during a 1-year period prior to and after implementation.

**Setting:** Anaesthetic clinics at two hospitals in Sweden.

**Participants:** All licensed practical nurses, registered nurses and physicians working in the operating theatres, intensive care units and post anaesthesia care units at anaesthetic clinics in two hospitals were invited to participate.

**Intervention:** Implementation of SBAR in an anaesthetic clinic.

**Primary and secondary outcomes:** The primary outcomes were staff members' perception of communication within and between different professions, as well as their perceptions of safety attitudes. Secondary outcomes were psychological empowerment and incident reports due to error of communication.

**Results:** In the intervention group, there were statistically significant improvements in the factors "Between-group communication accuracy" (p=0.039) and "Safety climate" (p=0.011). The total number of incident reports prior to implementation were 116 and after 208.

1  
2  
3 However, the proportion of incident reports due to communication errors decreased  
4  
5 significantly ( $p < 0.0001$ ) in the intervention group, from 31% to 11%.  
6

7 **Conclusions:** Implementing the communication tool SBAR in anaesthetic clinics can improve  
8  
9 communication between professionals, improve the safety climate and reduce incidents  
10  
11 caused by communication errors.  
12

13  
14  
15  
16 **Trial registration:** ISRCTN37251313  
17

## 18 19 20 21 **Article summary**

### 22 23 24 **Strengths and limitations of this study**

- 25  
26  
27 • Despite recommendation of implementing SBAR in healthcare there are few  
28  
29 intervention studies with a comparison group, using pre- and post-assessments,  
30  
31 evaluating both staff and clinical outcome, thus the study add new knowledge to the  
32  
33 subject area.  
34
  - 35  
36 • The implementation was followed by the authors using manipulation check, involving  
37  
38 randomized structured telephone interviews. To monitor the implementation the local  
39  
40 inter-professional workgroup conducted observations of handovers.  
41
  - 42  
43 • The response rate was satisfying, exceeding 70% at both baseline and follow-up in the  
44  
45 two groups.  
46
  - 47  
48 • The very natures of the quasi-experimental design entail selection biases as the lack of  
49  
50 randomization.  
51
- 52  
53  
54  
55  
56  
57  
58  
59  
60

## INTRODUCTION

Teamwork in operating theatres and intensive care units requires straightforward, clear, and consistent communication as well as good collaboration. Nonetheless, communication breakdowns are frequent during the pre-, intra- and postoperative period.<sup>1 2</sup> Communication and collaboration problems, in turn, have been shown to be the strongest predictors of health-related harm.<sup>2-4</sup> The communication tool SBAR (Situation, Background, Assessment, Recommendations) is used in high-risk organizations to make communication more effective and consistent, and it has also been introduced in healthcare. SBAR is thought to create conditions for accurate information exchange and encourage dialogue, and the World Health Organization (WHO) recommends using it in healthcare to increase patient safety.<sup>5</sup> Using the communication tool SBAR, important information can be transferred in a brief and concise manner, and in a predictable structure.<sup>6</sup> In a review<sup>7</sup> investigating studies on communication failures and how to avoid them, the authors suggested that one way to improve communication is to structure the information by employing tools such as SBAR.

Studies evaluating SBAR have been conducted in the US,<sup>8-10</sup> Canada,<sup>11 12</sup> Australia,<sup>13 14</sup> the UK,<sup>15</sup> Belgium<sup>16</sup> and the Netherlands.<sup>17</sup> The results have shown improved collaboration and nurse-physician communication, as perceived by nurses working in surgical and medical wards.<sup>16</sup> Other studies have shown improvements in team communication and the safety culture, as assessed by rehabilitation staff.<sup>11 12</sup> However, low adherence to SBAR was found in a simulation study among nurses working in surgical and medical wards one year after implementation.<sup>17</sup> Still another study found, in contrast, that about 60% of nurses reported using SBAR.<sup>9</sup> Findings from studies of simulated telephone referrals made by medical students and junior doctors have shown improved communication<sup>14</sup> and improved call impact

1  
2  
3 as measured by an observer when SBAR was used.<sup>13</sup> Studies measuring clinical outcomes  
4  
5 have found reduced unexpected death,<sup>16</sup> decreased order entry errors<sup>10</sup> and improvements in  
6  
7 safety reporting<sup>11</sup> after implementation of SBAR. Among the studies mentioned above, we  
8  
9 found only six that have used a comparison group,<sup>10-14 17</sup> and of these, three were simulation  
10  
11 studies.<sup>13 14 17</sup> One review<sup>18</sup> studying interventions intended to facilitate teamwork and  
12  
13 communication in healthcare found that only 3 of 14 studies measured clinical outcomes and  
14  
15 that only 7 of 14 measured effects on the safety culture.<sup>18</sup> Thus, there is a need to further  
16  
17 investigate staff and clinical outcomes with regard to use of the communication tool SBAR.  
18  
19

20  
21  
22  
23  
24 The aim of the present study was to examine staff members' perceptions of communication  
25  
26 within and between different professions, as well as their safety attitudes and psychological  
27  
28 empowerment, prior to and after implementation of the communication tool SBAR at an  
29  
30 anaesthetic clinic. A further aim was to investigate whether there were any differences in  
31  
32 change over time in these variables between an intervention group that was introduced to  
33  
34 SBAR and a comparison group. Still another aim was to study whether there was any change  
35  
36 in the proportion of incident reports due to communication errors. We hypothesized that  
37  
38 implementation of the communication tool SBAR would improve staff members' perception  
39  
40 of communication within and between different professions as well as their safety attitudes,  
41  
42 thereby decreasing reports of incidents caused by communication errors as well as increasing  
43  
44 staff members' perception of psychological empowerment.  
45  
46  
47  
48  
49  
50  
51  
52  
53  
54  
55  
56  
57  
58  
59  
60

## METHOD

### Design

A prospective intervention study with comparison group using pre- and post-assessments was used. The study involved one intervention group in which the SBAR was implemented (staff at an anaesthetic clinic at one hospital) and one comparison group (staff at another hospital's anaesthetic clinic). Questionnaires were delivered at baseline and at follow-up 6 months after implementation, and the proportion of incident reports at the two hospitals was measured during a 1-year period prior to and after implementation (Fig. 1).

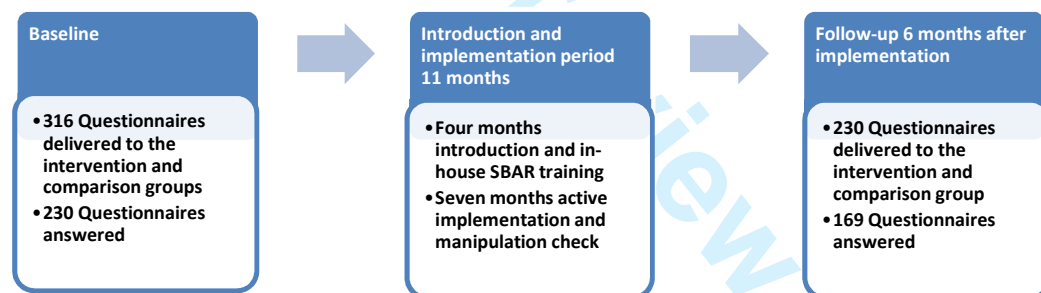

**Fig. 1** Outline of design

### Sample and procedures

A total of 316 questionnaires, and two reminders, were delivered to all staff (licensed practical nurses [LPNs], registered nurses [RNs] and physicians) working in the operating theatres, intensive care units and post anaesthesia care unit at anaesthetic clinics in the two

hospitals during spring 2011. The two hospitals were located in the same county council and thus the clinics shared the same top management. The response rate at baseline was 72% (n=139 of 194) in the intervention group and 75% (n=91 of 122) in the comparison group. The response rate at follow-up in 2012 was 72% (n=100 of 139) and 76% (n=69 of 91), respectively (Table 1). The drop-outs had fewer years working in the profession ( $p=0.005$ ) fewer years working at the clinic ( $p<0.001$ ) and statistically significant higher score on one factor measuring the variable safety attitudes and statistically significant lower score on one factor measuring the variable psychological empowerment (please see discussion section). There were no statistically significant differences between the intervention and comparison groups at baseline regarding age, sex, working years in the profession, working years at the clinic and working time (Table 2). However, at baseline there were statistically significant higher scores in the comparison group on four factors in the instrument measuring the variable safety attitudes and statistically significant higher scores on one factor in the instrument measuring the variable communication within and between different professions (please see discussion section).

**Table 1.** Reasons for non-participants/dropouts at baseline and follow-up

| <b>Dropout</b>          | <b>Intervention group</b> | <b>Comparison group</b> |
|-------------------------|---------------------------|-------------------------|
| <i>Baseline</i>         | 194                       | 122                     |
| Refusal                 | 3                         | 24                      |
| No reason               | 52                        | 7                       |
| Answered questionnaires | 139                       | 91                      |
| <i>Follow-up</i>        | 139                       | 91                      |
| Parental leave          | 3                         | 2                       |
| Changed workplace       | 3                         | 1                       |
| Long-term illness       | -                         | 1                       |
| Retired                 | 1                         | 1                       |
| Quit work               | 3                         | 6                       |
| Leave of absence        | 5                         | 1                       |
| Education               | 2                         | 1                       |
| Total unavailable staff | 17                        | 13                      |
| Eligible staff          | 122                       | 78                      |
| Refusal                 | 6                         | 6                       |
| No reason               | 16                        | 3                       |
| Answered questionnaires | 100                       | 69                      |



**Table 2.** Demographic data on staff members in the intervention group and control group who participated at baseline and follow-up. Mean (m), Standard deviation (SD), numbers (n) and percent (%)

|                                 | Intervention group<br>(n=100) | Comparison group<br>(n=69) | P-value |
|---------------------------------|-------------------------------|----------------------------|---------|
| Age, years, m (SD)              | 48.2 (8.7)                    | 48.6 (9.0)                 | 0.780   |
| Sex male/female, n              | 15 (15%)/85 (85%)             | 11 (16%)/58 (84%)          | 1.000   |
| Profession, n                   |                               |                            | 0.945   |
| - LPN                           | 27 (27%)                      | 18 (26%)                   |         |
| - RN                            | 63 (63%)                      | 43 (62%)                   |         |
| - Physician                     | 10 (10%)                      | 8 (12%)                    |         |
| Years in the profession, m (SD) | 17.5 (11.2)                   | 19.5 (10.2)                | 0.257   |
| Years at the clinic, m (SD)     | 15.2 (11.0)                   | 15.4 (10.3)                | 0.883   |
| Working full-time/part-time, n  | 60 (60%)/40 (40%)             | 48 (70%)/21 (30%)          | 0.254   |

Independent Samples T-test and Chi-square Test. The significant level is 0.05

LPN = Licensed Practical Nurse, RN = Registered Nurse

## Intervention

The decision to implement the communication tool SBAR at the clinic was taken by the management. Strategies to facilitate the implementation were: modifying a SBAR card, in-house training course, information material and observations during 7 months of the implementation period. A pocket SBAR card was slightly modified prior to implementation by a local inter-professional workgroup to adapt it to needs at the clinic. The intervention included an in-house training course (2.5 hours of instruction and role-playing) and implementation of the communication tool SBAR. During the introduction period May to September 2011, 155 of 194 (80%) staff were trained and the rest were offered continuous training. Informational material describing SBAR was distributed to all staff in the intervention group, who received the pocket card describing the SBAR structure to be used. At the post anaesthesia care unit, the SBAR card was also attached to the patients' tables, where most handovers were conducted, and on the wall in the room where the physician's handovers were conducted. At the intensive care unit, a printed SBAR template was used for the receiver's notes during handovers. All staff members in the intervention group were encouraged to take part in the training course and to use the communication tool SBAR in their daily work. The period with an in-house training course was followed by a 7-month

1  
2  
3 monitoring period, which consisted of 168 structured observations of handovers carried out  
4  
5 by four members of the local inter-professional workgroup. The observations were used by  
6  
7 management to monitor the intervention process and as feedback to the intervention group. In  
8  
9 the comparison group, no structured communication system was used.  
10

#### 11 Manipulation check:

12  
13 Careful control of the implementation is required for interpretation of the findings.<sup>19</sup> To check  
14  
15 whether SBAR was implemented as intended, measures were made during a 7-month period  
16  
17 to follow the implementation. In the intervention group, structured telephone interviews were  
18  
19 conducted by one author (MR) with a random sample of 10 staff each month, except for one  
20  
21 month when only six staff members were reached. In total, 11 physicians, 17 intensive care  
22  
23 nurses, 10 anaesthesia nurse, 8 operating theatre nurses and 20 LPNs were interviewed.  
24  
25 Results showed that the majority of staff had taken the in-house training course and had used  
26  
27 the SBAR tool during the past seven working days.  
28  
29  
30  
31  
32  
33  
34  
35  
36  
37

#### 38 Data collection

39  
40 Questionnaire data were collected prior to implementation of SBAR in April 2011 and at  
41  
42 follow-up 6 months after completion of the implementation period in October 2012. To  
43  
44 measure communication within and between different professions, the ICU Nurse-Physician  
45  
46 Questionnaire<sup>20</sup> was used, and the Safety Attitudes Questionnaire (SAQ)<sup>21</sup> was used to  
47  
48 measure staff members' attitudes toward six patient-safety-related domains. Spritzer's  
49  
50 empowerment scale<sup>22</sup> was used to measure psychological empowerment. Incident reports  
51  
52 were collected from the hospitals' registration systems during a 1-year period prior to (1 April  
53  
54 2010 to 31 March 2011) and after implementation of SBAR (1 April 2012 to 31 March 2013).  
55  
56  
57  
58  
59  
60

1  
2  
3 Primary outcome measures:

4  
5 The *ICU Nurse-Physician Questionnaire* (short version, section one)<sup>23</sup> consists of five factors:

6  
7 Within-group communication openness (4 items); Between-group communication openness  
8 (4 items); Within-group communication accuracy (4 items); Between-group communication  
9 accuracy (3 items); Communication timeliness (3 items). The original questionnaire was  
10 created to address the relationship between nurses and physicians only. But because LPNs are  
11 a common staff group in Sweden, the questionnaire was adapted for LPNs and thus to suite  
12 Swedish working conditions. The items are answered in a 5-point Likert scale ranging from  
13 “Strongly Disagree” to “Strongly Agree.” Negatively worded items are reversed before factor  
14 scores are averaged. The ICU Nurse-Physician Questionnaire has shown satisfactory  
15 psychometric properties. Cronbach’s alpha values ( $\alpha$ ) for the five factors have been 0.64 to  
16 0.88.<sup>20</sup> Translation of the questionnaire was conducted forward by the research team and  
17 back-translation was carried out by a bilingual translator.<sup>24</sup> In the present study,  $\alpha$ -values were  
18 between 0.69 and 0.83 at baseline and 0.68 and 0.85 at follow-up.  
19  
20  
21  
22  
23  
24  
25  
26  
27  
28  
29  
30  
31  
32  
33  
34  
35

36 The *Safety Attitudes Questionnaire* (SAQ, short form)<sup>21</sup> consists of six factors: Teamwork  
37 climate (6 items); Safety climate (7 items); Job satisfaction (5 items); Stress recognition (4  
38 items); Perceptions of management (6 items); Working conditions (3 items). The items are  
39 answered in a 5-point Likert scale ranging from “Disagree Strongly” to “Agree Strongly.”  
40 The negatively worded items are reversed and the scale is converted to a 0 - 100% scale  
41 where 0% = Disagree Strongly, 25% = Disagree Slightly, 50% = Neutral, 75% = Agree  
42 Slightly and 100% = Agree Strongly. The SAQ has shown satisfactory psychometric  
43 properties. Cronbach’s  $\alpha$ -values have been between 0.70 and 0.85 for the factors.<sup>21</sup>  
44  
45  
46  
47  
48  
49  
50  
51  
52  
53

54 Translation of the questionnaire was conducted forward by the research team and back-  
55  
56  
57  
58  
59  
60

1  
2  
3 translation was carried out by a bilingual translator.<sup>24</sup> In the present study,  $\alpha$ -values ranged  
4  
5 from 0.71 to 0.85 at baseline and from 0.71 to 0.86 at follow-up for the factors.  
6  
7

8  
9  
10 Secondary outcome measures:

11 *Spreitzer's empowerment scale*<sup>25</sup> consists of four factors: Meaning (3 items); Competence (3  
12 items); Self-determination (3 items); Impact (3 items). The items are answered on a 7-point  
13 Likert scale ranging from "Strongly Disagree" to "Strongly Agree." Factor scores and the  
14 total scale are averaged. The Swedish version of the scale has shown satisfactory  
15 psychometric properties, with  $\alpha$ -values ranging from 0.77 to 0.90.<sup>22</sup> In the present study,  $\alpha$ -  
16 values ranged from 0.86 to 0.88 at baseline and from 0.80 to 0.87 at follow-up for the factors.  
17  
18  
19  
20  
21  
22  
23  
24  
25  
26

27 The number of *incident reports* was measured during a 1-year period prior to (1 April 2010 to  
28 31 March 2011) and after implementation of SBAR (1 April 2012 to 31 March 2013). In  
29 accordance with WHO definitions,<sup>26</sup> we defined incident reports as "A process used to  
30 document occurrences that are not consistent with routine hospital operation or patient care."  
31 A communication error is defined as "Missing or wrong information exchange or  
32 misinterpretation or misunderstanding."<sup>26</sup> In the county council where the present study was  
33 conducted, the clinic administrator has overall responsibility for incident reports. The incident  
34 reports are examined by an investigator who reviewed the cause of the incident and what  
35 measures were taken. The result of the investigation then goes back to the clinic, where  
36 possible follow-ups are carried out.  
37  
38  
39  
40  
41  
42  
43  
44  
45  
46  
47  
48  
49  
50  
51  
52

### 53 **Data analysis**

54 The data were analysed using descriptive statistics such as means, standard deviations [SD],  
55 absolute numbers and percentages. For within-group comparisons over time, the Wilcoxon  
56  
57  
58  
59  
60

1  
2  
3 Signed Rank Test was used, and for between-group comparisons the Mann-Whitney U-test  
4  
5 was used. The Chi-square and Fisher's exact test were used to detect differences in the  
6  
7 frequency data. Factor scores in the three questionnaires were calculated if at least 66.7% of  
8  
9 the questions for each factor were answered. Internal consistency was calculated using  
10  
11 Cronbach's alpha. Non-parametric tests were used because the majority of factors did not  
12  
13 have a normal distribution. The level for statistical significance was set at  $p < 0.05$  (two-tailed).  
14  
15  
16  
17

### 18 **Ethical considerations**

19  
20 The study was approved (reg. no. 2011/061) by the Regional Ethical Review Board. All  
21  
22 participants received written information about the study aim and procedures and were told  
23  
24 that participation was strictly voluntary and could be discontinued at any time without  
25  
26 explanation.  
27  
28  
29  
30  
31  
32

## 33 **RESULTS**

### 34 **Primary outcome**

35  
36  
37 Of the five factors in the ICU Nurse-Physician Questionnaire, the factor Between-group  
38  
39 communication accuracy improved significantly ( $p = 0.001$ ) over time in the intervention  
40  
41 group. For the factor Within-group communication accuracy, there was a tendency for  
42  
43 improvement over time in the intervention group, though it was not statistically significant  
44  
45 ( $p = 0.076$ ). This finding required further investigation, and we proceeded by analyzing each  
46  
47 item. There was significant improvement over time for the item "It is often necessary for me  
48  
49 to go back and check the accuracy of information I have received from [physicians, nurses or  
50  
51 licensed practical nurses] in this unit" ( $p = 0.025$ ). In the comparison group, the factor  
52  
53 Between-group openness improved significantly ( $p = 0.039$ ) over time. When changes over  
54  
55  
56  
57  
58  
59  
60

1  
2  
3 time were compared between the intervention group and comparison group, the results  
4  
5 showed no statistically significant differences (Table 3). Of the factors in the SAQ, the factor  
6  
7 Safety climate improved significantly ( $p=0.011$ ) over time in the intervention group. For the  
8  
9 other factors in the SAQ, there were no statistically significant differences. In the comparison  
10  
11 group, the factor Perception of management at the unit showed a significant ( $p<0.001$ )  
12  
13 improvement over time, as did the factor Working condition ( $p=0.029$ ). When changes over  
14  
15 time were compared between the intervention group and comparison group, the results  
16  
17 showed a significant difference ( $p<0.001$ ) between groups for the factor Perception of  
18  
19 management at the unit. For the factor Safety climate, the p-value was 0.087 when change  
20  
21 over time between the groups was compared (Table 3).  
22  
23  
24  
25  
26

### 27 **Secondary outcome**

28  
29 In the intervention group, the number of incident reports during a 1-year period prior to  
30  
31 implementation was 116, whereof 36 (31%) were due to communication errors. The same  
32  
33 year, in the comparison group, 6 of the 24 (25%) registered incident reports were due to  
34  
35 communication errors. In the intervention group, during a 1-year period after implementation,  
36  
37 the incident reports due to communication errors had decreased to 23 of a total of 208 (11%).  
38  
39 During the same period in the comparison group, the number of incident reports due to  
40  
41 communication errors was 6 of 32 (19%). The decrease in the proportions of incident reports  
42  
43 due to communication errors in the intervention group was statistically significant ( $p<0.0001$ ),  
44  
45 though it was not in the comparison group ( $p=0.744$ ). Regarding psychological  
46  
47 empowerment, the results revealed no statistically significant changes over time in either the  
48  
49 intervention group or the comparison group (Table 3).  
50  
51  
52  
53  
54  
55  
56  
57  
58  
59  
60

**Table 3.** Staff members' assessment of communication within and between groups, safety attitudes and empowerment in the intervention and comparison group at baseline and follow-up as change over time between groups. Mean and Standard deviation (SD), n = 169.

| Measurement factors                         | Intervention group<br>– Within group |                      | Comparison group<br>– Within group |                      | Change over<br>time between<br>groups |
|---------------------------------------------|--------------------------------------|----------------------|------------------------------------|----------------------|---------------------------------------|
|                                             | <sup>1</sup> Mean value (SD)         | <sup>1</sup> p-value | <sup>1</sup> Mean value (SD)       | <sup>1</sup> p-value | <sup>2</sup> p-value                  |
| <b>ICU Nurse-Physician Questionnaire</b>    |                                      |                      |                                    |                      |                                       |
| <i>Within-group communication openness</i>  |                                      |                      |                                    |                      |                                       |
| Baseline                                    | 4.3 (0.6)                            |                      | 4.4 (0.6)                          |                      |                                       |
| Follow-up                                   | 4.3 (0.5)                            | 0.998                | 4.4 (0.5)                          | 0.529                | 0.390                                 |
| <i>Between-group communication openness</i> |                                      |                      |                                    |                      |                                       |
| Baseline                                    | 4.3 (0.5)                            |                      | 4.2 (0.6)                          |                      |                                       |
| Follow-up                                   | 4.3 (0.5)                            | 0.686                | 4.3 (0.6)                          | <b>0.039</b>         | 0.263                                 |
| <i>Within-group communication accuracy</i>  |                                      |                      |                                    |                      |                                       |
| Baseline                                    | 3.3 (0.8)                            |                      | 3.7 (0.8)                          |                      |                                       |
| Follow-up                                   | 3.4 (0.8)                            | 0.076                | 3.7 (0.9)                          | 0.966                | 0.371                                 |
| <i>Between-group communication accuracy</i> |                                      |                      |                                    |                      |                                       |
| Baseline                                    | 3.3 (0.8)                            |                      | 3.5 (0.8)                          |                      |                                       |
| Follow-up                                   | 3.5 (0.8)                            | <b>0.001</b>         | 3.6 (0.8)                          | 0.185                | 0.172                                 |
| <i>Communication timeliness</i>             |                                      |                      |                                    |                      |                                       |
| Baseline                                    | 4.2 (0.7)                            |                      | 4.2 (0.7)                          |                      |                                       |
| Follow-up                                   | 4.3 (0.6)                            | 0.612                | 4.3 (0.7)                          | 0.650                | 0.958                                 |
| <b>Safety Attitudes Questionnaire</b>       |                                      |                      |                                    |                      |                                       |
| <i>Teamwork climate</i>                     |                                      |                      |                                    |                      |                                       |
| Baseline                                    | 72.2 (15.1)                          |                      | 76.9 (15.1)                        |                      |                                       |
| Follow-up                                   | 73.8 (14.4)                          | 0.350                | 76.7 (15.8)                        | 0.914                | 0.584                                 |
| <i>Safety climate</i>                       |                                      |                      |                                    |                      |                                       |
| Baseline                                    | 63.1 (15.8)                          |                      | 70.3 (14.3)                        |                      |                                       |
| Follow-up                                   | 66.4 (16.2)                          | <b>0.011</b>         | 70.2 (16.0)                        | 0.949                | 0.087                                 |
| <i>Job satisfaction</i>                     |                                      |                      |                                    |                      |                                       |
| Baseline                                    | 75.3 (15.5)                          |                      | 81.5 (16.4)                        |                      |                                       |
| Follow-up                                   | 74.2 (15.4)                          | 0.604                | 81.7 (15.0)                        | 0.865                | 0.771                                 |
| <i>Stress recognition</i>                   |                                      |                      |                                    |                      |                                       |
| Baseline                                    | 68.0 (21.9)                          |                      | 65.8 (25.2)                        |                      |                                       |
| Follow-up                                   | 67.8 (20.8)                          | 0.483                | 63.5 (24.9)                        | 0.382                | 0.388                                 |

1  
2  
3  
4  
5  
6  
7  
8  
9  
10  
11  
12  
13  
14  
15  
16  
17  
18  
19  
20  
21  
22  
23  
24  
25  
26  
27  
28  
29  
30  
31  
32  
33  
34  
35  
36  
37  
38  
39  
40  
41  
42  
43  
44  
45  
46  
47  
48  
49

|                                      |             |       |             |                  |                  |
|--------------------------------------|-------------|-------|-------------|------------------|------------------|
| <i>Perception of management unit</i> |             |       |             |                  |                  |
| Baseline                             | 60.2 (17.9) |       | 59.2 (16.7) |                  |                  |
| Follow-up                            | 60.2 (18.6) | 0.667 | 68.6 (16.7) | <b>&lt;0.001</b> | <b>&lt;0.001</b> |
| <i>Working condition</i>             |             |       |             |                  |                  |
| Baseline                             | 63.9 (19.2) |       | 73.3 (15.6) |                  |                  |
| Follow-up                            | 63.5 (18.8) | 0.956 | 77.8 (16.2) | <b>0.029</b>     | 0.131            |
| <b>Spreitzer's Empowerment scale</b> |             |       |             |                  |                  |
| <i>Meaning</i>                       |             |       |             |                  |                  |
| Baseline                             | 6.2 (0.8)   |       | 6.3 (0.9)   |                  |                  |
| Follow-up                            | 6.3 (0.7)   | 0.270 | 6.3 (0.8)   | 0.935            | 0.602            |
| <i>Competence</i>                    |             |       |             |                  |                  |
| Baseline                             | 6.4 (0.7)   |       | 6.5 (0.6)   |                  |                  |
| Follow-up                            | 6.4 (0.6)   | 0.985 | 6.5 (0.7)   | 0.877            | 0.818            |
| <i>Self-determination</i>            |             |       |             |                  |                  |
| Baseline                             | 4.3 (1.2)   |       | 4.4 (1.5)   |                  |                  |
| Follow-up                            | 4.3 (1.3)   | 0.992 | 4.6 (1.3)   | 0.342            | 0.465            |
| <i>Impact</i>                        |             |       |             |                  |                  |
| Baseline                             | 4.2 (1.3)   |       | 4.5 (1.4)   |                  |                  |
| Follow-up                            | 4.2 (1.4)   | 0.639 | 4.5 (1.3)   | 0.867            | 0.857            |
| <i>Empowerment total factors</i>     |             |       |             |                  |                  |
| Baseline                             | 5.3 (0.7)   |       | 5.4 (0.8)   |                  |                  |
| Follow-up                            | 5.3 (0.8)   | 0.474 | 5.5 (0.7)   | 0.444            | 0.916            |

<sup>1</sup>Wilcoxon Signed Rank Test and <sup>2</sup>Mann-Whitney U-test. The significant level is 0.05 and statistical significant results are marked with boldface text



## DISCUSSION

SBAR is thought to facilitate communication between professions and increase safety as well as to decrease the negative effects the professional hierarchy may have on communication.

Our results showed that implementation of the communication tool SBAR resulted in significant improvement over time in staff members' perceptions of Between-group communication accuracy and Safety climate as well as a tendency toward improvement in Within-group communication accuracy. Furthermore, the proportion of incident reports due to communication errors decreased significantly, from 31% (36 of 116) to 11% (23 of 208), in the intervention group compared with a non-significant decrease, from 25% (6 of 24) to 19% (6 of 32), in the comparison group. Thus, in the intervention group safety reporting seemed to improve but the proportion of incident reports due to communication decreased significantly.

The improvement in staff members' perceptions of Between-group communication accuracy after implementation of the communication tool SBAR seen in the present study is similar to findings from a study by DeMeester<sup>16</sup>, where nurse-physician communication also improved. In a study by Manojlovich and DeCicco<sup>27</sup> Between-group communication was shown to be a significant predictor of perceived medication error<sup>27</sup>. Nurses and physicians are trained to express themselves in different ways<sup>28</sup> and communication between different professions is known to be a contributing factor in surgical malpractice claims.<sup>1</sup> Because staff members' perceptions of Between-group communication accuracy improved, it would seem that SBAR was able to bridge differences in style of communication.

Safety climate also improved, and the proportion of incident reports due to communication errors decreased in the intervention group, which may indicate that safety performance

1  
2  
3 improved. One study<sup>29</sup> of 91 hospitals found that a higher level of safety climate was  
4  
5 associated with higher safety performance at the hospital level. Furthermore, Huang *et al.*  
6  
7 (2010)<sup>30</sup> studied 30 ICUs in the US using SAQ and found that lower Safety climate was  
8  
9 associated with patient outcomes such as increased hospital length of stay. However, another  
10  
11 study by Rosen *et al.* (2010)<sup>31</sup> failed to show a relationship between safety climate and  
12  
13 hospital safety performance. As in the present study, improved perception of safety climate  
14  
15 has also been found in studies<sup>11 12</sup> of rehabilitation settings in which SBAR had been  
16  
17 implemented. Verbal communication errors were found to be an important cause of severe  
18  
19 patient safety incidents.<sup>32</sup> In the present study, there was a decrease in the proportion of  
20  
21 incident reports due to communication errors. According to the present results, one can  
22  
23 assume that SBAR made communication safer, resulting in a decrease in incident reports due  
24  
25 to communication errors. This interpretation is also in line with our hypothesis. We also  
26  
27 hypothesized that a secondary outcome of implementing SBAR could be an increase in staff  
28  
29 members' perception of psychological empowerment. In the present study, it would seem  
30  
31 reasonable to assume that SBAR training should have increased staff members'  
32  
33 empowerment, but no such effect was found during the study period.  
34  
35  
36  
37  
38  
39

40  
41 In the comparison group, there were no significant changes in staff members' perceptions of  
42  
43 Communication accuracy or Safety climate. However, the factors Between-group openness,  
44  
45 Perception of management at the unit and Working condition improved significantly over  
46  
47 time. During the period between baseline and follow-up, there were work-related changes in  
48  
49 the comparison group that may have affected the results. The staff in the operating theatre had  
50  
51 increased in size, and there had been discussions of the importance of collaboration at the  
52  
53 intensive care unit. On the other hand, SBAR was not expected to affect these particular  
54  
55 factors.  
56  
57  
58  
59  
60

### Strengths and weaknesses of the study

The strengths of the present study were that measures of safety culture and clinical outcomes were included, as previously recommended,<sup>18</sup> and that a comparison group was used.

Furthermore, during 7 months of the implementation period, we followed the implementation using a manipulation check involving randomized structured telephone interviews. An additional support in the implementation was observations of handovers conducted by the local inter-professional workgroup. In a simulation study, low adherence was found for use of SBAR during a 1-year period after implementation in a hospital.<sup>17</sup> In the present study, the manipulation check and observations showed that SBAR was in use at the clinic. One other strength is that the questionnaires used have shown satisfactory psychometric properties, and Cronbach's Alpha values in the present study for all instruments, total scale and factors were over 0.68. Although the two groups were different in size, there were no significant differences in the demographic data. The response rate was satisfying, exceeding 70% at both baseline and follow-up in the two groups. When interpreting the present results, possible threats to internal validity should be considered. First, the very nature of the quasi-experimental design entailed selection biases: The participants were not randomly assigned and there were statistically significant differences between the intervention group and the comparison group at baseline. The comparison group had higher scores on the factors Teamwork climate ( $p=0.045$ ), Safety climate ( $p=0.002$ ), Job satisfaction ( $p=0.004$ ), Working condition ( $p=0.002$ ) and Within-group communication accuracy ( $p=0.001$ ). Although the comparison group had higher baseline levels on the five factors that could have affected the results, there was still room for improvement. Second, the loss of subjects poses another threat to internal validity, in that the drop-outs had higher scores on the factor Teamwork climate ( $p=0.017$ ) and lower scores on the factor Competence ( $p=0.048$ ) than the participants did. On the other hand, the number of drop-outs was moderate. There were also differences in

1  
2  
3 incident reporting. The comparison group had overall lower frequency of registered incident  
4 reports. There may be several reasons for this, e.g. that the frequency of incidents was  
5 actually different or that there was a difference in the tendency to report incidents. Third, an  
6 additional threat to internal validity was that there may have been some diffusion of the  
7 intervention to the comparison group, which could have affected the results. Further research  
8 dealing with these methodological issues is needed to confirm our results.  
9  
10  
11  
12  
13  
14  
15  
16  
17  
18

### 19 **Conclusion**

20 Implementing the communication tool SBAR in anaesthetic care can improve communication  
21 between professionals, improve the safety climate and reduce incidents caused by  
22 communication errors.  
23  
24  
25  
26  
27  
28  
29

30 **Contributors** All authors (MR, GM, CLS and ME) contributed to the design, interpreted  
31 data, drafted and revised the article critically. Data analysis was conducted by MR and ME.  
32 MR collected data, conducted the manipulation check and wrote the manuscript under the  
33 supervision of GM, CLS and ME. All authors read and approved the final version of the  
34 paper.  
35  
36  
37  
38  
39  
40  
41  
42  
43  
44

45 **Funding** This work was supported by the Faculty of Health and Occupational Studies,  
46 University of Gävle and by the County Council Gävleborg. It was also supported by the  
47 Patient Insurance LÖF and the Swedish Society of Nursing, but these organizations had no  
48 role in the design and running of the study.  
49  
50  
51  
52  
53  
54  
55

56 **Competing Interests** None.  
57  
58  
59  
60

1  
2  
3  
4  
5 **Ethics approval** The Regional Ethical Review Board (reg. no. 2011/061).  
6  
7  
8  
9

10 **Data sharing statement** There is no additional data available for data sharing.  
11  
12  
13  
14  
15  
16  
17  
18  
19  
20  
21  
22  
23  
24  
25  
26  
27  
28  
29  
30  
31  
32  
33  
34  
35  
36  
37  
38  
39  
40  
41  
42  
43  
44  
45  
46  
47  
48  
49  
50  
51  
52  
53  
54  
55  
56  
57  
58  
59  
60

For peer review only

## REFERENCES

1. Greenberg CC, Regenbogen SE, Studdert DM, *et al.* Patterns of communication breakdowns resulting in injury to surgical patients. *J Am Coll Surg* 2007;**204**:533-40.
2. Lingard L, Espin S, Whyte S, *et al.* Communication failures in the operating room: an observational classification of recurrent types and effects. *Qual Saf Health Care* 2004;**13**:330-4.
3. Wiegmann DA, ElBardissi AW, Dearani JA, *et al.* Disruptions in surgical flow and their relationship to surgical errors: an exploratory investigation. *Surgery* 2007; **142**:658-65.
4. White AA, Pichert JW, Bledsoe SH, *et al.* Cause and effect analysis of closed claims in obstetrics and gynecology. *Obstet Gynecol* 2005;**105**:1031-8.
5. WHO Patient Safety Solutions| volume 1, solution 3 | May 2007 Available at:  
[http://www.refworks.com/refgrabit/rw2linkpage.aspx?subscriber=6107&user=1209&\\_id=1344860455630](http://www.refworks.com/refgrabit/rw2linkpage.aspx?subscriber=6107&user=1209&_id=1344860455630).  
Accessed 13/8/2012
6. Leonard M, Graham S, Bonacum D. The human factor: the critical importance of effective teamwork and communication in providing safe care. *Qual Saf Health Care* 2004;**13** Suppl 1:i85-90.
7. Flemming D, Hubner U. How to improve change of shift handovers and collaborative grounding and what role does the electronic patient record system play? Results of a systematic literature review. *Int J Med Inform* 2013;**82**:580-92.
8. Renz SM, Boltz MP, Wagner LM, *et al.* Examining the feasibility and utility of an SBAR protocol in long-term care. *Geriatr Nurs* 2013; **34**:295-301.
9. Compton J, Copeland K, Flanders S, *et al.* Implementing SBAR across a large multihospital health system. *Jt Comm J Qual Patient Saf* 2012;**38**:261-8.
10. Telem DA, Buch KE, Ellis S, *et al.* Integration of a formalized handoff system into the surgical curriculum: resident perspectives and early results. *Arch Surg* 2011; Jan;**146**:89-93.

- 1  
2  
3 11. Velji K, Baker GR, Fancott C, *et al.* Effectiveness of an Adapted SBAR Communication Tool for a  
4 Rehabilitation Setting. *Healthc Q* 2008;**11**:72-9.  
5  
6  
7 12. Andreoli A, Fancott C, Velji K, *et al.* Using SBAR to communicate falls risk and management in inter-  
8 professional rehabilitation teams. *Healthc Q* 2010; **13**:94-101.  
9  
10  
11 13. Cunningham NJ, Weiland TJ, van Dijk J, *et al.* Telephone referrals by junior doctors: a randomised  
12 controlled trial assessing the impact of SBAR in a simulated setting. *Postgrad Med J* 2012; **88**:619-26.  
13  
14  
15 14. Marshall S, Harrison J, Flanagan B. The teaching of a structured tool improves the clarity and content of  
16 interprofessional clinical communication. *Qual Saf Health Care* 2009;**18**:137-40.  
17  
18  
19 15. Christie P, Robinson H. Using a communication framework at handover to boost patient outcomes. *Nurs*  
20 *Times* 2009; **105**:13-5.  
21  
22  
23 16. De Meester K, Verspuy M, Monsieurs KG, *et al.* SBAR improves nurse-physician communication and  
24 reduces unexpected death: A pre and post intervention study. *Resuscitation* 2013;**84**: 1192-6  
25  
26  
27 17. Ludikhuizen J, de Jonge E, Goossens A. Measuring adherence among nurses one year after training in  
28 applying the Modified Early Warning Score and Situation-Background-Assessment-Recommendation  
29 instruments. *Resuscitation* 2011; **82**:1428-33.  
30  
31  
32 18. McCulloch P, Rathbone J, Catchpole K. Interventions to improve teamwork and communications among  
33 healthcare staff. *Br J Surg* 2011; **98**:469-79.  
34  
35  
36 19. Kazdin AE. *Research design in clinical psychology*. 4. uppl. ed. Boston, MA: Allyn and Bacon; 2003.  
37  
38  
39 20. Shortell SM, Rousseau DM, Gillies RR, *et al.* Organizational assessment in intensive care units (ICUs):  
40 construct development, reliability, and validity of the ICU nurse-physician questionnaire. *Med Care* 1991;  
41 **29**:709-26.  
42  
43  
44 21. Sexton JB, Helmreich RL, Neilands TB, *et al.* The Safety Attitudes Questionnaire: psychometric properties,  
45 benchmarking data, and emerging research. *BMC Health Serv Res* 2006; **6**:44.  
46  
47  
48  
49  
50  
51  
52  
53  
54  
55  
56  
57  
58  
59  
60

- 1  
2  
3 22. Hochwalder J, Bergsten Brucefors A. A psychometric assessment of a Swedish translation of Spreitzer's  
4 empowerment scale. *Scand J Psychol* 2005; **46**:521-9.  
5  
6  
7  
8 23. The organization and management of intensive care units. Copyright 1989. Available at:  
9 <http://shortellresearch.berkeley.edu/ICU.htm>. Accessed 24/9/2013.  
10  
11  
12 24. Maneesriwongul W, Dixon JK. Instrument translation process: a methods review. *J Adv Nurs* 2004; **48**:175-  
13 86.  
14  
15  
16  
17 25. Spreitzer GM. Psychological empowerment in the workplace: Dimensions, measurement, and validation.  
18 *Academy of Management Journal* 1995;**38**:1442-65.  
19  
20  
21  
22 26. WHO Conceptual framework for the international classification for patient safety. Januari 2009. Available  
23 at: <http://www.who.int/patientsafety/implementation/taxonomy/publications/en/index.html>. Accessed 9/24/2013,  
24 2013.  
25  
26  
27  
28  
29 27. Manojlovich M, DeCicco B. Healthy work environments, nurse-physician communication, and patients'  
30 outcomes. *Am J Crit Care* 2007; **16**:536-43.  
31  
32  
33  
34 28. Greenfield LJ. Doctors and nurses: a troubled partnership. *Ann Surg* 1999;**230**:279-88.  
35  
36  
37 29. Singer S, Lin S, Falwell A, Gaba D, *et al*. Relationship of safety climate and safety performance in hospitals.  
38 *Health Serv Res* 2009; **44**:399-421.  
39  
40  
41 30. Huang DT, Clermont G, Kong L, *et al*. Intensive care unit safety culture and outcomes: a US multicenter  
42 study. *Int J Qual Health Care* 2010; **22**:151-61.  
43  
44  
45  
46 31. Rosen AK, Singer S, Shibe Z, *et al*. Hospital safety climate and safety outcomes: is there a relationship in  
47 the VA?. *Med Care Res Rev* 2010; **67**:590-608.  
48  
49  
50  
51 32. Rabol LI, Andersen ML, Ostergaard D, *et al*. Descriptions of verbal communication errors between staff. An  
52 analysis of 84 root cause analysis-reports from Danish hospitals. *BMJ Qual Saf* 2011; **20**:268-74.  
53  
54  
55  
56  
57  
58  
59  
60





**SBAR improves communication and safety climate and decreases incident reports due to communication errors in an anaesthetic clinic: a prospective intervention study**

|                                 |                                                                                                                                                                                                                                                                                                                                                                                                                                                                                                                                                                          |
|---------------------------------|--------------------------------------------------------------------------------------------------------------------------------------------------------------------------------------------------------------------------------------------------------------------------------------------------------------------------------------------------------------------------------------------------------------------------------------------------------------------------------------------------------------------------------------------------------------------------|
| Journal:                        | <i>BMJ Open</i>                                                                                                                                                                                                                                                                                                                                                                                                                                                                                                                                                          |
| Manuscript ID:                  | bmjopen-2013-004268.R1                                                                                                                                                                                                                                                                                                                                                                                                                                                                                                                                                   |
| Article Type:                   | Research                                                                                                                                                                                                                                                                                                                                                                                                                                                                                                                                                                 |
| Date Submitted by the Author:   | 06-Dec-2013                                                                                                                                                                                                                                                                                                                                                                                                                                                                                                                                                              |
| Complete List of Authors:       | Randmaa, Maria; University of Gävle, Faculty of Health and Occupational Studies; Uppsala University, Department of Public Health and Caring Sciences<br>Mårtensson, Gunilla; University of Gävle, Faculty of Health and Occupational Studies; Uppsala University, Department of Public Health and Caring Sciences<br>Leo Swenne, Christine; Uppsala University, Department of Public Health and Caring Sciences<br>Engström, Maria; University of Gävle, Faculty of Health and Occupational Studies; Uppsala University, Department of Public Health and Caring Sciences |
| <b>Primary Subject Heading</b>: | Communication                                                                                                                                                                                                                                                                                                                                                                                                                                                                                                                                                            |
| Secondary Subject Heading:      | Anaesthesia                                                                                                                                                                                                                                                                                                                                                                                                                                                                                                                                                              |
| Keywords:                       | Adult anaesthesia < ANAESTHETICS, Adult intensive & critical care < ANAESTHETICS, Health & safety < HEALTH SERVICES ADMINISTRATION & MANAGEMENT                                                                                                                                                                                                                                                                                                                                                                                                                          |
|                                 |                                                                                                                                                                                                                                                                                                                                                                                                                                                                                                                                                                          |

SCHOLARONE™  
Manuscripts

1  
2  
3 **SBAR improves communication and safety climate and decreases incident**  
4  
5 **reports due to communication errors in an anaesthetic clinic: a prospective**  
6  
7 **intervention study**  
8  
9

10  
11  
12 Maria Randmaa<sup>1,2,3\*</sup>, Gunilla Mårtensson<sup>1,3</sup>, Christine Leo Swenne<sup>3</sup>, Maria Engström<sup>1,3</sup>

13  
14 1) Faculty of Health and Occupational Studies, University of Gävle, Gävle, Sweden

15  
16 2) Department of Anaesthesia, County Council of Gävleborg, Sweden

17  
18 3) Department of Public Health and Caring Sciences, Uppsala University, Uppsala, Sweden  
19

20  
21 \*Corresponding author;

22  
23 Maria Randmaa, Faculty of Health and Occupational Studies, University of Gävle, S-801 76

24  
25 Gävle, Sweden

26  
27 E-mail: [maaraa@hig.se](mailto:maaraa@hig.se)  
28  
29  
30  
31  
32  
33  
34  
35  
36  
37  
38  
39  
40  
41  
42  
43  
44  
45  
46  
47  
48  
49  
50  
51  
52  
53  
54  
55  
56  
57  
58  
59  
60

**Word count:** 3441 words excluding title page, abstract, references, figures and tables

**Keywords:** Anaesthetic clinic, Communication, Incident reports, Safety attitudes, SBAR

## ABSTRACT

**Objectives:** We aimed to examine staff members' perceptions of communication within and between different professions, safety attitudes and psychological empowerment, prior to and after implementation of the communication tool SBAR (Situation-Background-Assessment-Recommendation) at an anaesthetic clinic. The aim was also to study whether there was any change in the proportion of incident reports caused by communication errors.

**Design:** A prospective intervention study with comparison group using pre- and post-assessments. Questionnaire data were collected from staff in an intervention (n=100) and a comparison group (n=69) at the anaesthetic clinic in two hospitals prior to (2011) and after (2012) implementation of SBAR. The proportion of incident reports due to communication errors was calculated during a 1-year period prior to and after implementation.

**Setting:** Anaesthetic clinics at two hospitals in Sweden.

**Participants:** All licensed practical nurses, registered nurses and physicians working in the operating theatres, intensive care units and post anaesthesia care units at anaesthetic clinics in two hospitals were invited to participate.

**Intervention:** Implementation of SBAR in an anaesthetic clinic.

**Primary and secondary outcomes:** The primary outcomes were staff members' perception of communication within and between different professions, as well as their perceptions of safety attitudes. Secondary outcomes were psychological empowerment and incident reports due to error of communication.

**Results:** In the intervention group, there were statistically significant improvements in the factors "Between-group communication accuracy" (p=0.039) and "Safety climate" (p=0.011). The proportion of incident reports due to communication errors decreased significantly (p<0.0001) in the intervention group, from 31% to 11%.

1  
2  
3 **Conclusions:** Implementing the communication tool SBAR in anaesthetic clinics was  
4  
5 associated with improvement in staff members' perception of communication between  
6  
7 professionals and their perception of the safety climate as well as with a decreased proportion  
8  
9 of incident reports related to communication errors.  
10  
11

12  
13  
14 **Trial registration:** ISRCTN37251313  
15  
16

## 17 **Article summary**

### 18 **Strengths and limitations of this study**

- 19  
20  
21  
22  
23  
24  
25 • Despite recommendation of implementing SBAR in healthcare there are few  
26  
27 intervention studies with a comparison group, using pre- and post-assessments,  
28  
29 evaluating both staff members' perception of communication and safety attitudes as  
30  
31 well as incident reports due to communication errors, thus the study add new  
32  
33 knowledge to the subject area.  
34  
35
- 36  
37 • The implementation was followed by the authors using manipulation check, involving  
38  
39 randomized structured telephone interviews. To monitor the implementation the local  
40  
41 inter-professional workgroup conducted observations of handovers.  
42
- 43  
44 • The response rate was satisfying, exceeding 70% at both baseline and follow-up in the  
45  
46 two groups.  
47
- 48  
49 • The very natures of the quasi-experimental design entail selection biases as the lack of  
50  
51 randomization.  
52  
53  
54  
55  
56  
57  
58  
59  
60

## INTRODUCTION

Teamwork in operating theatres and intensive care units requires straightforward, clear, and consistent communication as well as good collaboration. Nonetheless, communication breakdowns are frequent during the pre-, intra- and postoperative period.<sup>1 2</sup> Communication and collaboration problems, in turn, have been shown to be the strongest predictors of health-related harm.<sup>2-4</sup> The communication tool SBAR (Situation, Background, Assessment, Recommendations) is used in high-risk organizations to make communication more effective and consistent, and it has also been introduced in healthcare. SBAR is thought to create conditions for accurate information exchange and encourage dialogue, and the World Health Organization (WHO) recommends using it in healthcare to increase patient safety.<sup>5</sup> Using the communication tool SBAR, important information can be transferred in a brief and concise manner, and in a predictable structure.<sup>6</sup> In a review<sup>7</sup> investigating studies on communication failures and how to avoid them, the authors suggested that one way to improve communication is to structure the information by employing tools such as SBAR.

Studies evaluating SBAR have been conducted in the US,<sup>8-10</sup> Canada,<sup>11 12</sup> Australia,<sup>13 14</sup> the UK,<sup>15</sup> Belgium<sup>16</sup> and the Netherlands.<sup>17</sup> The results have shown improved collaboration and nurse-physician communication, as perceived by nurses working in surgical and medical wards.<sup>16</sup> Other studies have shown improvements in team communication and the safety culture, as assessed by rehabilitation staff.<sup>11 12</sup> However, low adherence to SBAR was found in a simulation study among nurses working in surgical and medical wards one year after implementation.<sup>17</sup> Still another study found, in contrast, that about 60% of nurses reported using SBAR.<sup>9</sup> Findings from studies of simulated telephone referrals made by medical students and junior doctors have shown improved communication<sup>14</sup> and improved call impact

1  
2  
3 as measured by an observer when SBAR was used.<sup>13</sup> Studies measuring clinical outcomes  
4  
5 have found reduced unexpected death,<sup>16</sup> decreased order entry errors<sup>10</sup> and improvements in  
6  
7 safety reporting<sup>11</sup> after implementation of SBAR. Among the studies mentioned above, we  
8  
9 found only six that have used a comparison group,<sup>10-14 17</sup> and of these, three were simulation  
10  
11 studies.<sup>13 14 17</sup> One review<sup>18</sup> studying interventions intended to facilitate teamwork and  
12  
13 communication in healthcare found that only 3 of 14 studies measured clinical outcomes and  
14  
15 that only 7 of 14 measured effects on the safety culture.<sup>18</sup> Thus, there is a need to further  
16  
17 investigate staff and clinical outcomes with regard to use of the communication tool SBAR.  
18  
19

20  
21  
22  
23  
24 The aim of the present study was to examine staff members' perceptions of communication  
25  
26 within and between different professions, as well as their safety attitudes and psychological  
27  
28 empowerment, prior to and after implementation of the communication tool SBAR at an  
29  
30 anaesthetic clinic. A further aim was to investigate whether there were any differences in  
31  
32 change over time in these variables between an intervention group that was introduced to  
33  
34 SBAR and a comparison group. Still another aim was to study whether there was any change  
35  
36 in the proportion of incident reports due to communication errors. We hypothesized that  
37  
38 implementation of the communication tool SBAR would improve staff members' perception  
39  
40 of communication within and between different professions as well as their safety attitudes,  
41  
42 thereby decreasing reports of incidents caused by communication errors as well as increasing  
43  
44 staff members' perception of psychological empowerment.  
45  
46  
47  
48  
49  
50  
51  
52  
53  
54  
55  
56  
57  
58  
59  
60

## METHOD

### Design

A prospective intervention study with comparison group using pre- and post-assessments was used. The study involved one intervention group in which the SBAR was implemented (staff at an anaesthetic clinic at one hospital) and one comparison group (staff at another hospital's anaesthetic clinic). Questionnaires were delivered at baseline and at follow-up 6 months after implementation, and the proportion of incident reports at the two hospitals was measured during a 1-year period prior to and after implementation (Fig.1).

### Sample and procedures

A total of 316 questionnaires, and two reminders, were delivered to all staff (licensed practical nurses [LPNs], registered nurses [RNs] and physicians) working in the operating theatres, intensive care units and post anaesthesia care unit at anaesthetic clinics in the two hospitals during spring 2011. The two hospitals were located in the same county council and thus the clinics shared the same top management.

### Intervention

The decision to implement the communication tool SBAR at the clinic was taken by the management. Strategies to facilitate the implementation were: modifying a SBAR card, in-house training course, information material and observations during 7 months of the implementation period. A pocket SBAR card was slightly modified prior to implementation by a local inter-professional workgroup to adapt it to needs at the clinic. The intervention included an in-house training course (2.5 hours of instruction and role-playing) and implementation of the communication tool SBAR. During the introduction period May to

1  
2  
3 September 2011, 155 of 194 (80%) staff were trained and the rest were offered continuous  
4  
5 training. Informational material describing SBAR was distributed to all staff in the  
6  
7 intervention group, who received the pocket card describing the SBAR structure to be used.  
8  
9 At the post anaesthesia care unit, the SBAR card was also attached to the patients' tables,  
10  
11 where most handovers were conducted, and on the wall in the room where the physician's  
12  
13 handovers were conducted. At the intensive care unit, a printed SBAR template was used for  
14  
15 the receiver's notes during handovers. All staff members in the intervention group were  
16  
17 encouraged to take part in the training course and to use the communication tool SBAR in  
18  
19 their daily work. The period with an in-house training course was followed by a 7-month  
20  
21 monitoring period, which consisted of 168 structured observations of handovers carried out  
22  
23 by four members of the local inter-professional workgroup. The observations were used by  
24  
25 management to monitor the intervention process and as feedback to the intervention group. In  
26  
27 the comparison group, no structured communication system was used.  
28  
29  
30  
31  
32  
33  
34

35 Manipulation check:

36  
37 Careful control of the implementation is required for interpretation of the findings.<sup>19</sup> To check  
38  
39 whether SBAR was implemented as intended, measures were made during a 7-month period  
40  
41 to follow the implementation. In the intervention group, structured telephone interviews were  
42  
43 conducted by one author (MR) with a random sample of 10 staff each month, except for one  
44  
45 month when only six staff members were reached. In total, 11 physicians, 17 intensive care  
46  
47 nurses, 10 anaesthesia nurse, 8 operating theatre nurses and 20 LPNs were interviewed.  
48  
49 Results showed that the majority of staff had taken the in-house training course and had used  
50  
51 the SBAR tool during the past seven working days.  
52  
53  
54  
55  
56  
57

## 58 Data collection

59  
60



1  
2  
3 Questionnaire data were collected prior to implementation of SBAR in April 2011 and at  
4  
5 follow-up 6 months after completion of the implementation period in October 2012. To  
6  
7 measure communication within and between different professions, the ICU Nurse-Physician  
8  
9 Questionnaire<sup>20</sup> was used, and the Safety Attitudes Questionnaire (SAQ)<sup>21</sup> was used to  
10  
11 measure staff members' attitudes toward six patient-safety-related domains. Spritzer's  
12  
13 empowerment scale<sup>22</sup> was used to measure psychological empowerment. Incident reports  
14  
15 were collected from the hospitals' registration systems during a 1-year period prior to (1 April  
16  
17 2010 to 31 March 2011) and after implementation of SBAR (1 April 2012 to 31 March 2013).  
18  
19  
20

21  
22  
23 Primary outcome measures:

24  
25 The *ICU Nurse-Physician Questionnaire* (short version, section one)<sup>23</sup> consists of five factors:

26  
27 Within-group communication openness (4 items); Between-group communication openness  
28  
29 (4 items); Within-group communication accuracy (4 items); Between-group communication  
30  
31 accuracy (3 items); Communication timeliness (3 items). The original questionnaire was  
32  
33 created to address the relationship between nurses and physicians only. But because LPNs are  
34  
35 a common staff group in Sweden, the questionnaire was adapted for LPNs and thus to suite  
36  
37 Swedish working conditions. The term within-group communication means communication  
38  
39 within the same profession (e.g. physician's perception of communicating with physician's)  
40  
41 and the term between-group communication mean e.g. physician's perception of  
42  
43 communicating with nurses and physician's perception of communicating with LPNs and so  
44  
45 on. The items are answered in a 5-point Likert scale ranging from "Strongly Disagree" to  
46  
47 "Strongly Agree." Negatively worded items are reversed before factor scores are averaged.  
48  
49

50  
51 The ICU Nurse-Physician Questionnaire has shown satisfactory psychometric properties.

52  
53 Cronbach's alpha values ( $\alpha$ ) for the five factors have been 0.64 to 0.88.<sup>20</sup> Translation of the  
54  
55 questionnaire was conducted forward by the research team and back-translation was carried  
56  
57  
58  
59  
60

1  
2  
3 out by a bilingual translator.<sup>24</sup> In the present study,  $\alpha$ -values were between 0.68 and 0.88 at  
4  
5 baseline and 0.68 and 0.85 at follow-up (Table 3).  
6  
7

8  
9 The *Safety Attitudes Questionnaire* (SAQ, short form)<sup>21</sup> consists of six factors: Teamwork  
10 climate (6 items); Safety climate (7 items); Job satisfaction (5 items); Stress recognition (4  
11 items); Perceptions of management (6 items); Working conditions (3 items). The items are  
12 answered in a 5-point Likert scale ranging from “Disagree Strongly” to “Agree Strongly.”  
13  
14 The negatively worded items are reversed and the scale is converted to a 0 - 100% scale  
15 where 0% = Disagree Strongly, 25% = Disagree Slightly, 50% = Neutral, 75% = Agree  
16 Slightly and 100% = Agree Strongly. The SAQ has shown satisfactory psychometric  
17 properties. Cronbach’s  $\alpha$ -values have been between 0.70 and 0.85 for the factors.<sup>21</sup>  
18  
19

20 Translation of the questionnaire was conducted forward by the research team and back-  
21 translation was carried out by a bilingual translator.<sup>24</sup> In the present study,  $\alpha$ -values ranged  
22 from 0.71 to 0.85 at baseline and from 0.71 to 0.86 at follow-up for the factors (Table 3).  
23  
24

25 Secondary outcome measures:

26  
27 *Spreitzer’s empowerment scale*<sup>25</sup> consists of four factors: Meaning (3 items); Competence (3  
28 items); Self-determination (3 items); Impact (3 items). The items are answered on a 7-point  
29 Likert scale ranging from “Strongly Disagree” to “Strongly Agree.” Factor scores and the  
30 total scale are averaged. The Swedish version of the scale has shown satisfactory  
31 psychometric properties, with  $\alpha$ -values ranging from 0.77 to 0.90.<sup>22</sup> In the present study,  $\alpha$ -  
32 values ranged from 0.85 to 0.88 at baseline and from 0.80 to 0.87 at follow-up for the factors  
33 (Table 3).  
34  
35

36  
37 The number of *incident reports* was measured during a 1-year period prior to (1 April 2010 to  
38  
39 31 March 2011) and after implementation of SBAR (1 April 2012 to 31 March 2013). In  
40  
41  
42  
43  
44  
45  
46  
47  
48  
49  
50  
51  
52  
53

1  
2  
3 accordance with WHO definitions,<sup>26</sup> we defined incident reports as “A process used to  
4 document occurrences that are not consistent with routine hospital operation or patient care.”  
5  
6 A communication error is defined as “Missing or wrong information exchange or  
7 misinterpretation or misunderstanding.”<sup>26</sup> In the county council where the present study was  
8 conducted, the clinic administrator has overall responsibility for incident reports. The incident  
9 reports are examined by an investigator who reviewed the cause of the incident and what  
10 measures were taken. The result of the investigation then goes back to the clinic, where  
11 possible follow-ups are carried out.  
12  
13  
14  
15  
16  
17  
18  
19  
20  
21  
22  
23

### 24 **Data analysis**

25  
26 The data were analysed using descriptive statistics such as means, standard deviations [SD],  
27 absolute numbers and percentages. For within-group comparisons over time, the Wilcoxon  
28 Signed Rank Test was used, and for between-group comparisons the Mann-Whitney U-test  
29 was used. The Chi-square and Fisher’s exact test were used to detect differences in the  
30 frequency data. Factor scores in the three questionnaires were calculated if at least 66.7% of  
31 the questions for each factor were answered. Internal consistency was calculated using  
32 Cronbach’s alpha. Non-parametric tests were used because the majority of factors did not  
33 have a normal distribution. The level for statistical significance was set at  $p < 0.05$  (two-tailed).  
34  
35  
36  
37  
38  
39  
40  
41  
42  
43  
44  
45

### 46 **Ethical considerations**

47  
48 The study was approved (reg. no. 2011/061) by the Regional Ethical Review Board. All  
49 participants received written information about the study aim and procedures and were told  
50 that participation was strictly voluntary and could be discontinued at any time without  
51 explanation.  
52  
53  
54  
55  
56  
57  
58  
59  
60

## RESULTS

### Sample characteristics

The response rate at baseline was 72% (n=139 of 194) in the intervention group and 75% (n=91 of 122) in the comparison group. The response rate at follow-up in 2012 was 72% (n=100 of 139) and 76% (n=69 of 91), respectively (Table 1). The drop-outs had fewer years working in the profession (p=0.005) fewer years working at the clinic (p<0.001) and higher scores on the factor Teamwork climate (p=0.017) and lower scores on the factor Competence (p=0.048) than the participants did. There were no statistically significant differences between the intervention and comparison groups at baseline regarding age, sex, working years in the profession, working years at the clinic and working time (Table 2). However, at baseline there were statistically significant higher scores in the comparison group on five factors; Teamwork climate (p=0.045), Safety climate (p=0.002), Job satisfaction (p=0.004), Working condition (p=0.002) and Within-group communication accuracy (p=0.001).

**Table 1.** Reasons for non-participants/dropouts at baseline and follow-up

| <b>Dropout</b>          | <b>Intervention group</b> | <b>Comparison group</b> |
|-------------------------|---------------------------|-------------------------|
| <i>Baseline</i>         | 194                       | 122                     |
| Refusal                 | 3                         | 24                      |
| No reason               | 52                        | 7                       |
| Answered questionnaires | 139                       | 91                      |
| <i>Follow-up</i>        | 139                       | 91                      |
| Parental leave          | 3                         | 2                       |
| Changed workplace       | 3                         | 1                       |
| Long-term illness       | -                         | 1                       |
| Retired                 | 1                         | 1                       |
| Quit work               | 3                         | 6                       |
| Leave of absence        | 5                         | 1                       |
| Education               | 2                         | 1                       |
| Total unavailable staff | 17                        | 13                      |
| Eligible staff          | 122                       | 78                      |
| Refusal                 | 6                         | 6                       |
| No reason               | 16                        | 3                       |
| Answered questionnaires | 100                       | 69                      |

**Table 2.** Demographic data on staff members in the intervention group and control group who participated at baseline and follow-up. Mean (m), Standard deviation (SD), numbers (n) and percent (%)

|                                 | Intervention group<br>(n=100) | Comparison group<br>(n=69) | P-value |
|---------------------------------|-------------------------------|----------------------------|---------|
| Age, years, m (SD)              | 48.2 (8.7)                    | 48.6 (9.0)                 | 0.780   |
| Sex male/female, n              | 15 (15%)/85 (85%)             | 11 (16%)/58 (84%)          | 1.000   |
| Profession, n                   |                               |                            | 0.945   |
| - LPN                           | 27 (27%)                      | 18 (26%)                   |         |
| - RN                            | 63 (63%)                      | 43 (62%)                   |         |
| - Physician                     | 10 (10%)                      | 8 (12%)                    |         |
| Years in the profession, m (SD) | 17.5 (11.2)                   | 19.5 (10.2)                | 0.257   |
| Years at the clinic, m (SD)     | 15.2 (11.0)                   | 15.4 (10.3)                | 0.883   |
| Working full-time/part-time, n  | 60 (60%)/40 (40%)             | 48 (70%)/21 (30%)          | 0.254   |

Independent Samples T-test and Chi-square Test. The significant level is 0.05

LPN = Licensed Practical Nurse, RN = Registered Nurse

### Primary outcome

Of the five factors in the ICU Nurse-Physician Questionnaire, the factor Between-group communication accuracy improved significantly ( $p=0.001$ ) over time in the intervention group. For the factor Within-group communication accuracy, there was a tendency for improvement over time in the intervention group, though it was not statistically significant ( $p=0.076$ ). This finding required further investigation, and we proceeded by analyzing each item. There was significant improvement over time for the item “It is often necessary for me to go back and check the accuracy of information I have received from [physicians, nurses or licensed practical nurses] in this unit” ( $p=0.025$ ). In the comparison group, the factor Between-group openness improved significantly ( $p=0.039$ ) over time. When changes over time were compared between the intervention group and comparison group, the results showed no statistically significant differences (Table 3). Of the factors in the SAQ, the factor Safety climate improved significantly ( $p=0.011$ ) over time in the intervention group. For the other factors in the SAQ, there were no statistically significant differences. In the comparison group, the factor Perception of management at the unit showed a significant ( $p<0.001$ ) improvement over time, as did the factor Working condition ( $p=0.029$ ). When changes over

1  
2  
3 time were compared between the intervention group and comparison group, the results  
4  
5 showed a significant difference ( $p < 0.001$ ) between groups for the factor Perception of  
6  
7 management at the unit. For the factor Safety climate, the p-value was 0.087 when change  
8  
9 over time between the groups was compared (Table 3).  
10

### 11 12 13 14 **Secondary outcome**

15  
16 In the intervention group, the number of incident reports during a 1-year period prior to  
17  
18 implementation was 116, whereof 36 (31%) were due to communication errors. The same  
19  
20 year, in the comparison group, 6 of the 24 (25%) registered incident reports were due to  
21  
22 communication errors. In the intervention group, during a 1-year period after implementation,  
23  
24 the incident reports due to communication errors had decreased to 23 of a total of 208 (11%).  
25  
26 During the same period in the comparison group, the number of incident reports due to  
27  
28 communication errors was 6 of 32 (19%). The decrease in the proportions of incident reports  
29  
30 due to communication errors in the intervention group was statistically significant ( $p < 0.0001$ ),  
31  
32 though it was not in the comparison group ( $p = 0.744$ ). Regarding psychological  
33  
34 empowerment, the results revealed no statistically significant changes over time in either the  
35  
36 intervention group or the comparison group (Table 3).  
37  
38  
39  
40  
41  
42  
43  
44  
45  
46  
47  
48  
49  
50  
51  
52  
53  
54  
55  
56  
57  
58  
59  
60

**Table 3.** Staff members' assessment of communication within and between groups, safety attitudes and empowerment in the intervention and comparison group at baseline and follow-up as change over time between groups. Mean and Standard deviation (SD), n = 169.

| Measurement factors                         | Cronbach's alpha | Intervention group<br>- Within group |                      | Comparison group<br>- Within group |                      | Change over time between groups |
|---------------------------------------------|------------------|--------------------------------------|----------------------|------------------------------------|----------------------|---------------------------------|
|                                             |                  | <sup>1</sup> Mean value (SD)         | <sup>1</sup> p-value | <sup>1</sup> Mean value (SD)       | <sup>1</sup> p-value | <sup>2</sup> p-value            |
| <b>ICU Nurse-Physician Questionnaire</b>    |                  |                                      |                      |                                    |                      |                                 |
| <i>Within-group communication openness</i>  |                  |                                      |                      |                                    |                      |                                 |
| Baseline                                    | 0.80             | 4.3 (0.6)                            |                      | 4.4 (0.6)                          |                      |                                 |
| Follow-up                                   | 0.78             | 4.3 (0.5)                            | 0.998                | 4.4 (0.5)                          | 0.529                | 0.390                           |
| <i>Between-group communication openness</i> |                  |                                      |                      |                                    |                      |                                 |
| Baseline                                    |                  |                                      |                      |                                    |                      |                                 |
| Physician↔RN; LPN↔Physician; RN↔LPN         | 0.82; 0.88; 0.84 | 4.3 (0.5)                            |                      | 4.2 (0.6)                          |                      |                                 |
| Follow-up                                   |                  |                                      |                      |                                    |                      |                                 |
| Physician↔RN; LPN↔Physician; RN↔LPN         | 0.85; 0.84; 0.82 | 4.3 (0.5)                            | 0.686                | 4.3 (0.6)                          | <b>0.039</b>         | 0.263                           |
| <i>Within-group communication accuracy</i>  |                  |                                      |                      |                                    |                      |                                 |
| Baseline                                    | 0.73             | 3.3 (0.8)                            |                      | 3.7 (0.8)                          |                      |                                 |
| Follow-up                                   | 0.75             | 3.4 (0.8)                            | 0.076                | 3.7 (0.9)                          | 0.966                | 0.371                           |
| <i>Between-group communication accuracy</i> |                  |                                      |                      |                                    |                      |                                 |
| Baseline                                    |                  |                                      |                      |                                    |                      |                                 |
| Physician↔RN; LPN↔Physician; RN↔LPN         | 0.69; 0.68; 0.77 | 3.3 (0.8)                            |                      | 3.5 (0.8)                          |                      |                                 |
| Follow-up                                   |                  |                                      |                      |                                    |                      |                                 |
| Physician↔RN; LPN↔Physician; RN↔LPN         | 0.77; 0.69; 0.76 | 3.5 (0.8)                            | <b>0.001</b>         | 3.6 (0.8)                          | 0.185                | 0.172                           |
| <i>Communication timeliness</i>             |                  |                                      |                      |                                    |                      |                                 |
| Baseline                                    | 0.74             | 4.2 (0.7)                            |                      | 4.2 (0.7)                          |                      |                                 |
| Follow-up                                   | 0.68             | 4.3 (0.6)                            | 0.612                | 4.3 (0.7)                          | 0.650                | 0.958                           |
| <b>Safety Attitudes Questionnaire</b>       |                  |                                      |                      |                                    |                      |                                 |
| <i>Teamwork climate</i>                     |                  |                                      |                      |                                    |                      |                                 |
| Baseline                                    | 0.73             | 72.2 (15.1)                          |                      | 76.9 (15.1)                        |                      |                                 |
| Follow-up                                   | 0.74             | 73.8 (14.4)                          | 0.350                | 76.7 (15.8)                        | 0.914                | 0.584                           |
| <i>Safety climate</i>                       |                  |                                      |                      |                                    |                      |                                 |
| Baseline                                    | 0.76             | 63.1 (15.8)                          |                      | 70.3 (14.3)                        |                      |                                 |
| Follow-up                                   | 0.78             | 66.4 (16.2)                          | <b>0.011</b>         | 70.2 (16.0)                        | 0.949                | 0.087                           |
| <i>Job satisfaction</i>                     |                  |                                      |                      |                                    |                      |                                 |

|                                      |      |             |       |             |                  |                  |
|--------------------------------------|------|-------------|-------|-------------|------------------|------------------|
| Baseline                             | 0.85 | 75.3 (15.5) |       | 81.5 (16.4) |                  |                  |
| Follow-up                            | 0.86 | 74.2 (15.4) | 0.604 | 81.7 (15.0) | 0.865            | 0.771            |
| <i>Stress recognition</i>            |      |             |       |             |                  |                  |
| Baseline                             | 0.85 | 68.0 (21.9) |       | 65.8 (25.2) |                  |                  |
| Follow-up                            | 0.82 | 67.8 (20.8) | 0.483 | 63.5 (24.9) | 0.382            | 0.388            |
| <i>Perception of management unit</i> |      |             |       |             |                  |                  |
| Baseline                             | 0.76 | 60.2 (17.9) |       | 59.2 (16.7) |                  |                  |
| Follow-up                            | 0.80 | 60.2 (18.6) | 0.667 | 68.6 (16.7) | <b>&lt;0.001</b> | <b>&lt;0.001</b> |
| <i>Working condition</i>             |      |             |       |             |                  |                  |
| Baseline                             | 0.71 | 63.9 (19.2) |       | 73.3 (15.6) |                  |                  |
| Follow-up                            | 0.71 | 63.5 (18.8) | 0.956 | 77.8 (16.2) | <b>0.029</b>     | 0.131            |
| <b>Spreitzer's Empowerment scale</b> |      |             |       |             |                  |                  |
| <i>Meaning</i>                       |      |             |       |             |                  |                  |
| Baseline                             | 0.86 | 6.2 (0.8)   |       | 6.3 (0.9)   |                  |                  |
| Follow-up                            | 0.86 | 6.3 (0.7)   | 0.270 | 6.3 (0.8)   | 0.935            | 0.602            |
| <i>Competence</i>                    |      |             |       |             |                  |                  |
| Baseline                             | 0.86 | 6.4 (0.7)   |       | 6.5 (0.6)   |                  |                  |
| Follow-up                            | 0.80 | 6.4 (0.6)   | 0.985 | 6.5 (0.7)   | 0.877            | 0.818            |
| <i>Self-determination</i>            |      |             |       |             |                  |                  |
| Baseline                             | 0.86 | 4.3 (1.2)   |       | 4.4 (1.5)   |                  |                  |
| Follow-up                            | 0.86 | 4.3 (1.3)   | 0.992 | 4.6 (1.3)   | 0.342            | 0.465            |
| <i>Impact</i>                        |      |             |       |             |                  |                  |
| Baseline                             | 0.88 | 4.2 (1.3)   |       | 4.5 (1.4)   |                  |                  |
| Follow-up                            | 0.87 | 4.2 (1.4)   | 0.639 | 4.5 (1.3)   | 0.867            | 0.857            |
| <i>Empowerment total factors</i>     |      |             |       |             |                  |                  |
| Baseline                             | 0.85 | 5.3 (0.7)   |       | 5.4 (0.8)   |                  |                  |
| Follow-up                            | 0.86 | 5.3 (0.8)   | 0.474 | 5.5 (0.7)   | 0.444            | 0.916            |

<sup>1</sup>Wilcoxon Signed Rank Test and <sup>2</sup>Mann-Whitney U-test. The significant level is 0.05 and statistical significant results are marked with boldface text  
 LPN = Licensed Practical Nurse, RN = Registered Nurse



## DISCUSSION

SBAR is thought to facilitate communication between professions and increase safety as well as to decrease the negative effects the professional hierarchy may have on communication.

Our results showed that implementation of the communication tool SBAR resulted in significant improvement over time in staff members' perceptions of Between-group communication accuracy and Safety climate as well as a tendency toward improvement in Within-group communication accuracy. Furthermore, the proportion of incident reports due to communication errors decreased significantly, from 31% (36 of 116) to 11% (23 of 208), in the intervention group compared with a non-significant decrease, from 25% (6 of 24) to 19% (6 of 32), in the comparison group. Thus, in the intervention group safety reporting seemed to improve but the proportion of incident reports due to communication decreased significantly.

The improvement in staff members' perceptions of Between-group communication accuracy after implementation of the communication tool SBAR seen in the present study is similar to findings from a study by DeMeester<sup>16</sup>, where nurse-physician communication also improved. In a study by Manojlovich and DeCicco<sup>27</sup> Between-group communication was shown to be a significant predictor of perceived medication error<sup>27</sup>. Nurses and physicians are trained to express themselves in different ways<sup>28</sup> and communication between different professions is known to be a contributing factor in surgical malpractice claims.<sup>1</sup> Because staff members' perceptions of Between-group communication accuracy improved, it would seem that SBAR was able to bridge differences in style of communication.

Safety climate also improved, and the proportion of incident reports due to communication errors decreased in the intervention group, which may indicate that safety performance

1  
2  
3 improved. One study<sup>29</sup> of 91 hospitals found that a higher level of safety climate was  
4  
5 associated with higher safety performance at the hospital level. Furthermore, Huang *et al.*  
6  
7 (2010)<sup>30</sup> studied 30 ICUs in the US using SAQ and found that lower Safety climate was  
8  
9 associated with patient outcomes such as increased hospital length of stay. However, another  
10  
11 study by Rosen *et al.* (2010)<sup>31</sup> failed to show a relationship between safety climate and  
12  
13 hospital safety performance. As in the present study, improved perception of safety climate  
14  
15 has also been found in studies<sup>11 12</sup> of rehabilitation settings in which SBAR had been  
16  
17 implemented. Verbal communication errors were found to be an important cause of severe  
18  
19 patient safety incidents.<sup>32</sup> In the present study, there was a decrease in the proportion of  
20  
21 incident reports due to communication errors. According to the present results, one can  
22  
23 assume that SBAR made communication safer, resulting in a decrease in incident reports due  
24  
25 to communication errors. This interpretation is also in line with our hypothesis. We also  
26  
27 hypothesized that a secondary outcome of implementing SBAR could be an increase in staff  
28  
29 members' perception of psychological empowerment. In the present study, it would seem  
30  
31 reasonable to assume that SBAR training should have increased staff members'  
32  
33 empowerment, but no such effect was found during the study period.  
34  
35  
36  
37  
38  
39  
40

41 In the comparison group, there were no significant changes in staff members' perceptions of  
42  
43 Communication accuracy or Safety climate. However, the factors Between-group  
44  
45 communication openness, Perception of management at the unit and Working condition  
46  
47 improved significantly over time. During the period between baseline and follow-up, there  
48  
49 were work-related changes in the comparison group that may have affected the results. The  
50  
51 staff in the operating theatre had increased in size, and there had been discussions of the  
52  
53 importance of collaboration at the intensive care unit. When working condition is improved  
54  
55 one can expect that also communication improves.  
56  
57  
58  
59  
60

### Strengths and weaknesses of the study

The strengths of the present study were that measures of both safety culture and the number of incident reports related to communication were included, as previously recommended,<sup>18</sup> and that a comparison group was used. Furthermore, during 7 months of the implementation period, we followed the implementation using a manipulation check involving randomized structured telephone interviews. An additional support in the implementation was observations of handovers conducted by the local inter-professional workgroup. In a simulation study, low adherence was found for use of SBAR during a 1-year period after implementation in a hospital.<sup>17</sup> In the present study, the manipulation check and observations showed that SBAR was in use at the clinic. One other strength is that the questionnaires used have shown satisfactory psychometric properties, and Cronbach's Alpha values in the present study for all instruments, total scale and factors were over 0.68. Although the two groups were different in size, there were no significant differences in the demographic data. The distribution was not normal and a limitation was that it was not possible to do multivariate analysis to correct for the differences at baseline in some variables as "Between-group communication openness", Perception of management unit" and "Working conditions". The response rate was satisfying, exceeding 70% at both baseline and follow-up in the two groups. When interpreting the present results, possible threats to internal validity should be considered. First, the very nature of the quasi-experimental design entailed selection biases: The participants were not randomly assigned and there were statistically significant differences between the intervention group and the comparison group at baseline. Although the comparison group had higher baseline levels on the five factors that could have affected the results, there was still room for improvement. Second, the loss of subjects poses another threat to internal validity, in that the drop-outs had statistically higher scores on the factor Teamwork climate and statistically lower scores on the factor Competence than the

1  
2  
3 participants did. On the other hand, the number of drop-outs was moderate. There were also  
4  
5 differences in incident reporting. The comparison group had overall lower frequency of  
6  
7 registered incident reports. There may be several reasons for this, e.g. that the frequency of  
8  
9 incidents was actually different or that there was a difference in the tendency to report  
10  
11 incidents. Third, an additional threat to internal validity was that there may have been some  
12  
13 diffusion of the intervention to the comparison group, which could have affected the results.  
14  
15 Further research dealing with these methodological issues is needed to confirm our results.  
16  
17  
18  
19

## 20 21 **Conclusion**

22  
23 Implementing the communication tool SBAR in anaesthetic care can improve communication  
24  
25 between professionals, improve the safety climate and reduce incidents caused by  
26  
27 communication errors.  
28  
29  
30  
31  
32  
33  
34  
35  
36  
37  
38  
39  
40  
41  
42  
43  
44  
45  
46  
47  
48  
49  
50  
51  
52  
53  
54  
55  
56  
57  
58  
59  
60

## Figure legend

### Fig. 1 Outline of design

**Contributors** All authors (MR, GM, CLS and ME) contributed to the design, interpreted data, drafted and revised the article critically. Data analysis was conducted by MR and ME. MR collected data, conducted the manipulation check and wrote the manuscript under the supervision of GM, CLS and ME. All authors read and approved the final version of the paper.

**Funding** This work was supported by the Faculty of Health and Occupational Studies, University of Gävle and by the County Council Gävleborg. It was also supported by the Patient Insurance LÖF and the Swedish Society of Nursing, but these organizations had no role in the design and running of the study.

**Competing Interests** None.

**Ethics approval** The Regional Ethical Review Board (reg. no. 2011/061).

**Data sharing statement** No additional data available.

## REFERENCES

1. Greenberg CC, Regenbogen SE, Studdert DM, *et al.* Patterns of communication breakdowns resulting in injury to surgical patients. *J Am Coll Surg* 2007;**204**:533-40.
2. Lingard L, Espin S, Whyte S, *et al.* Communication failures in the operating room: an observational classification of recurrent types and effects. *Qual Saf Health Care* 2004;**13**:330-4.
3. Wiegmann DA, ElBardissi AW, Dearani JA, *et al.* Disruptions in surgical flow and their relationship to surgical errors: an exploratory investigation. *Surgery* 2007; **142**:658-65.
4. White AA, Pichert JW, Bledsoe SH, *et al.* Cause and effect analysis of closed claims in obstetrics and gynecology. *Obstet Gynecol* 2005;**105**:1031-8.

- 1  
2  
3 5. WHO Patient Safety Solutions| volume 1, solution 3 | May 2007 Available at:  
4  
5 [http://www.refworks.com/refgrabit/rw2linkpage.aspx?subscriber=6107&user=1209&\\_id=1344860455630](http://www.refworks.com/refgrabit/rw2linkpage.aspx?subscriber=6107&user=1209&_id=1344860455630).  
6  
7 Accessed 13/8/2012  
8  
9  
10 6. Leonard M, Graham S, Bonacum D. The human factor: the critical importance of effective teamwork and  
11 communication in providing safe care. *Qual Saf Health Care* 2004;**13** Suppl 1:i85-90.  
12  
13  
14 7. Flemming D, Hubner U. How to improve change of shift handovers and collaborative grounding and what  
15 role does the electronic patient record system play? Results of a systematic literature review. *Int J Med Inform*  
16 2013;**82**:580-92.  
17  
18  
19  
20 8. Renz SM, Boltz MP, Wagner LM, *et al*. Examining the feasibility and utility of an SBAR protocol in long-  
21 term care. *Geriatr Nurs* 2013; **34**:295-301.  
22  
23  
24 9. Compton J, Copeland K, Flanders S, *et al*. Implementing SBAR across a large multihospital health system. *Jt*  
25 *Comm J Qual Patient Saf* 2012;**38**:261-8.  
26  
27  
28  
29 10. Telem DA, Buch KE, Ellis S, *et al*. Integration of a formalized handoff system into the surgical curriculum:  
30 resident perspectives and early results. *Arch Surg* 2011; Jan;**146**:89-93.  
31  
32  
33  
34 11. Velji K, Baker GR, Fancott C, *et al*. Effectiveness of an Adapted SBAR Communication Tool for a  
35 Rehabilitation Setting. *Healthc Q* 2008;**11**:72-9.  
36  
37  
38  
39 12. Andreoli A, Fancott C, Velji K, *et al*. Using SBAR to communicate falls risk and management in inter-  
40 professional rehabilitation teams. *Healthc Q* 2010; **13**:94-101.  
41  
42  
43  
44 13. Cunningham NJ, Weiland TJ, van Dijk J, *et al*. Telephone referrals by junior doctors: a randomised  
45 controlled trial assessing the impact of SBAR in a simulated setting. *Postgrad Med J* 2012; **88**:619-26.  
46  
47  
48  
49 14. Marshall S, Harrison J, Flanagan B. The teaching of a structured tool improves the clarity and content of  
50 interprofessional clinical communication. *Qual Saf Health Care* 2009;**18**:137-40.  
51  
52  
53  
54 15. Christie P, Robinson H. Using a communication framework at handover to boost patient outcomes. *Nurs*  
55 *Times* 2009; **105**:13-5.  
56  
57  
58  
59  
60

- 1  
2  
3 16. De Meester K, Verspuy M, Monsieurs KG, *et al.* SBAR improves nurse-physician communication and  
4 reduces unexpected death: A pre and post intervention study. *Resuscitation* 2013;**84**: 1192-6  
5  
6  
7  
8 17. Ludikhuizen J, de Jonge E, Goossens A. Measuring adherence among nurses one year after training in  
9 applying the Modified Early Warning Score and Situation-Background-Assessment-Recommendation  
10 instruments. *Resuscitation* 2011; **82**:1428-33.  
11  
12  
13  
14 18. McCulloch P, Rathbone J, Catchpole K. Interventions to improve teamwork and communications among  
15 healthcare staff. *Br J Surg* 2011; **98**:469-79.  
16  
17  
18  
19 19. Kazdin AE. *Research design in clinical psychology*. 4. uppl. ed. Boston, MA: Allyn and Bacon; 2003.  
20  
21  
22 20. Shortell SM, Rousseau DM, Gillies RR, *et al.* Organizational assessment in intensive care units (ICUs):  
23 construct development, reliability, and validity of the ICU nurse-physician questionnaire. *Med Care* 1991;  
24 **29**:709-26.  
25  
26  
27  
28  
29 21. Sexton JB, Helmreich RL, Neilands TB, *et al.* The Safety Attitudes Questionnaire: psychometric properties,  
30 benchmarking data, and emerging research. *BMC Health Serv Res* 2006; **6**:44.  
31  
32  
33  
34 22. Hochwalder J, Bergsten Brucefors A. A psychometric assessment of a Swedish translation of Spreitzer's  
35 empowerment scale. *Scand J Psychol* 2005; **46**:521-9.  
36  
37  
38  
39 23. The organization and management of intensive care units. Copyright 1989. Available at:  
40 <http://shortellresearch.berkeley.edu/ICU.htm>. Accessed 24/9/2013.  
41  
42  
43  
44 24. Manesriwongul W, Dixon JK. Instrument translation process: a methods review. *J Adv Nurs* 2004; 48:175-  
45 86.  
46  
47  
48  
49 25. Spreitzer GM. Psychological empowerment in the workplace: Dimensions, measurement, and validation.  
50 *Academy of Management Journal* 1995;**38**:1442-65.  
51  
52  
53  
54 26. WHO Conceptual framework for the international classification for patient safety. Januari 2009. Available  
55 at: <http://www.who.int/patientsafety/implementation/taxonomy/publications/en/index.html>. Accessed 9/24/2013,  
56  
57 2013.  
58  
59  
60



- 1  
2  
3 27. Manojlovich M, DeCicco B. Healthy work environments, nurse-physician communication, and patients'  
4 outcomes. *Am J Crit Care* 2007; **16**:536-43.  
5  
6  
7 28. Greenfield LJ. Doctors and nurses: a troubled partnership. *Ann Surg* 1999;**230**:279-88.  
8  
9  
10 29. Singer S, Lin S, Falwell A, Gaba D, *et al*. Relationship of safety climate and safety performance in hospitals.  
11 *Health Serv Res* 2009; **44**:399-421.  
12  
13  
14 30. Huang DT, Clermont G, Kong L, *et al*. Intensive care unit safety culture and outcomes: a US multicenter  
15 study. *Int J Qual Health Care* 2010; **22**:151-61.  
16  
17  
18 31. Rosen AK, Singer S, Shibe Z, *et al*. Hospital safety climate and safety outcomes: is there a relationship in  
19 the VA?. *Med Care Res Rev* 2010; **67**:590-608.  
20  
21  
22 32. Rabol LI, Andersen ML, Ostergaard D, *et al*. Descriptions of verbal communication errors between staff. An  
23 analysis of 84 root cause analysis-reports from Danish hospitals. *BMJ Qual Saf* 2011; **20**:268-74.  
24  
25  
26  
27  
28  
29  
30  
31  
32  
33  
34  
35  
36  
37  
38  
39  
40  
41  
42  
43  
44  
45  
46  
47  
48  
49  
50  
51  
52  
53  
54  
55  
56  
57  
58  
59  
60

1  
2  
3 **SBAR improves communication and safety climate and decreases incident**  
4  
5 **reports due to communication errors in an anaesthetic clinic: a prospective**  
6  
7  
8 **intervention study**  
9

10  
11  
12 Maria Randmaa<sup>1,2,3\*</sup>, Gunilla Mårtensson<sup>1,3</sup>, Christine Leo Swenne<sup>3</sup>, Maria Engström<sup>1,3</sup>

13  
14 1) Faculty of Health and Occupational Studies, University of Gävle, Gävle, Sweden

15  
16 2) Department of Anaesthesia, County Council of Gävleborg, Sweden

17  
18 3) Department of Public Health and Caring Sciences, Uppsala University, Uppsala, Sweden  
19

20  
21 \*Corresponding author;

22 Maria Randmaa, Faculty of Health and Occupational Studies, University of Gävle, S-801 76

23  
24 Gävle, Sweden

25  
26 E-mail: [maaraa@hig.se](mailto:maaraa@hig.se)  
27  
28  
29  
30  
31  
32  
33  
34  
35  
36  
37  
38  
39  
40  
41  
42  
43  
44  
45  
46  
47  
48  
49  
50  
51  
52  
53  
54  
55  
56  
57  
58  
59  
60

**Word count:** 3441 words excluding title page, abstract, references, figures and tables

**Keywords:** Anaesthetic clinic, Communication, Incident reports, Safety attitudes, SBAR

## ABSTRACT

**Objectives:** We aimed to examine staff members' perceptions of communication within and between different professions, safety attitudes and psychological empowerment, prior to and after implementation of the communication tool SBAR (**Situation-Background-Assessment-Recommendation**) at an anaesthetic clinic. The aim was also to study whether there was any change in the proportion of incident reports caused by communication errors.

**Design:** A prospective intervention study with comparison group using pre- and post-assessments. Questionnaire data were collected from staff in an intervention (n=100) and a comparison group (n=69) at the anaesthetic clinic in two hospitals prior to (2011) and after (2012) implementation of SBAR. The proportion of incident reports due to communication errors was calculated during a 1-year period prior to and after implementation.

**Setting:** Anaesthetic clinics at two hospitals in Sweden.

**Participants:** All licensed practical nurses, registered nurses and physicians working in the operating theatres, intensive care units and post anaesthesia care units at anaesthetic clinics in two hospitals were invited to participate.

**Intervention:** Implementation of SBAR in an anaesthetic clinic.

**Primary and secondary outcomes:** The primary outcomes were staff members' perception of communication within and between different professions, as well as their perceptions of safety attitudes. Secondary outcomes were psychological empowerment and incident reports due to error of communication.

**Results:** In the intervention group, there were statistically significant improvements in the factors "Between-group communication accuracy" (p=0.039) and "Safety climate" (p=0.011). The proportion of incident reports due to communication errors decreased significantly (p<0.0001) in the intervention group, from 31% to 11%.

1  
2  
3 **Conclusions:** Implementing the communication tool SBAR in anaesthetic clinics was  
4 associated with improvement in staff members' perception of communication between  
5 professionals and their perception of the safety climate as well as with a decreased proportion  
6 of incident reports related to communication errors.  
7  
8  
9  
10

11  
12  
13  
14 **Trial registration:** ISRCTN37251313  
15

## 16 17 18 **Article summary** 19

### 20 21 **Strengths and limitations of this study** 22

- 23  
24 • Despite recommendation of implementing SBAR in healthcare there are few  
25 intervention studies with a comparison group, using pre- and post-assessments,  
26 evaluating both staff members' perception of communication and safety attitudes as  
27 well as incident reports due to communication errors, thus the study add new  
28 knowledge to the subject area.  
29  
30  
31  
32
- 33  
34 • The implementation was followed by the authors using manipulation check, involving  
35 randomized structured telephone interviews. To monitor the implementation the local  
36 inter-professional workgroup conducted observations of handovers.  
37  
38  
39
- 40  
41 • The response rate was satisfying, exceeding 70% at both baseline and follow-up in the  
42 two groups.  
43  
44  
45
- 46  
47 • The very natures of the quasi-experimental design entail selection biases as the lack of  
48 randomization.  
49  
50  
51  
52  
53  
54  
55  
56  
57  
58  
59  
60

## INTRODUCTION

Teamwork in operating theatres and intensive care units requires straightforward, clear, and consistent communication as well as good collaboration. Nonetheless, communication breakdowns are frequent during the pre-, intra- and postoperative period.<sup>1 2</sup> Communication and collaboration problems, in turn, have been shown to be the strongest predictors of health-related harm.<sup>2-4</sup> The communication tool SBAR (Situation, Background, Assessment, Recommendations) is used in high-risk organizations to make communication more effective and consistent, and it has also been introduced in healthcare. SBAR is thought to create conditions for accurate information exchange and encourage dialogue, and the World Health Organization (WHO) recommends using it in healthcare to increase patient safety.<sup>5</sup> Using the communication tool SBAR, important information can be transferred in a brief and concise manner, and in a predictable structure.<sup>6</sup> In a review<sup>7</sup> investigating studies on communication failures and how to avoid them, the authors suggested that one way to improve communication is to structure the information by employing tools such as SBAR.

Studies evaluating SBAR have been conducted in the US,<sup>8-10</sup> Canada,<sup>11 12</sup> Australia,<sup>13 14</sup> the UK,<sup>15</sup> Belgium<sup>16</sup> and the Netherlands.<sup>17</sup> The results have shown improved collaboration and nurse-physician communication, as perceived by nurses working in surgical and medical wards.<sup>16</sup> Other studies have shown improvements in team communication and the safety culture, as assessed by rehabilitation staff.<sup>11 12</sup> However, low adherence to SBAR was found in a simulation study among nurses working in surgical and medical wards one year after implementation.<sup>17</sup> Still another study found, in contrast, that about 60% of nurses reported using SBAR.<sup>9</sup> Findings from studies of simulated telephone referrals made by medical students and junior doctors have shown improved communication<sup>14</sup> and improved call impact

1  
2  
3 as measured by an observer when SBAR was used.<sup>13</sup> Studies measuring clinical outcomes  
4  
5 have found reduced unexpected death,<sup>16</sup> decreased order entry errors<sup>10</sup> and improvements in  
6  
7 safety reporting<sup>11</sup> after implementation of SBAR. Among the studies mentioned above, we  
8  
9 found only six that have used a comparison group,<sup>10-14 17</sup> and of these, three were simulation  
10  
11 studies.<sup>13 14 17</sup> One review<sup>18</sup> studying interventions intended to facilitate teamwork and  
12  
13 communication in healthcare found that only 3 of 14 studies measured clinical outcomes and  
14  
15 that only 7 of 14 measured effects on the safety culture.<sup>18</sup> Thus, there is a need to further  
16  
17 investigate staff and clinical outcomes with regard to use of the communication tool SBAR.  
18  
19

20  
21  
22  
23  
24 The aim of the present study was to examine staff members' perceptions of communication  
25  
26 within and between different professions, as well as their safety attitudes and psychological  
27  
28 empowerment, prior to and after implementation of the communication tool SBAR at an  
29  
30 anaesthetic clinic. A further aim was to investigate whether there were any differences in  
31  
32 change over time in these variables between an intervention group that was introduced to  
33  
34 SBAR and a comparison group. Still another aim was to study whether there was any change  
35  
36 in the proportion of incident reports due to communication errors. We hypothesized that  
37  
38 implementation of the communication tool SBAR would improve staff members' perception  
39  
40 of communication within and between different professions as well as their safety attitudes,  
41  
42 thereby decreasing reports of incidents caused by communication errors as well as increasing  
43  
44 staff members' perception of psychological empowerment.  
45  
46  
47  
48  
49  
50  
51  
52  
53  
54  
55  
56  
57  
58  
59  
60

## METHOD

### Design

A prospective intervention study with comparison group using pre- and post-assessments was used. The study involved one intervention group in which the SBAR was implemented (staff at an anaesthetic clinic at one hospital) and one comparison group (staff at another hospital's anaesthetic clinic). Questionnaires were delivered at baseline and at follow-up 6 months after implementation, and the proportion of incident reports at the two hospitals was measured during a 1-year period prior to and after implementation (Fig. 1).

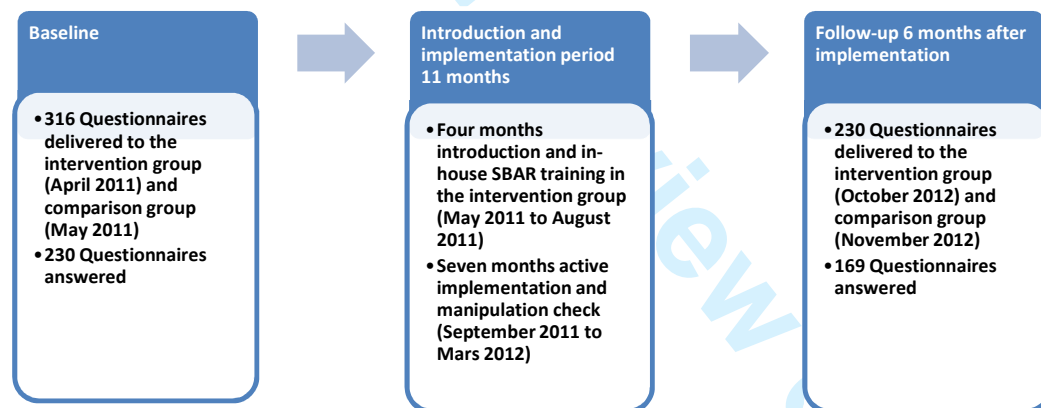

**Fig. 1** Outline of design

### Sample and procedures

A total of 316 questionnaires, and two reminders, were delivered to all staff (licensed practical nurses [LPNs], registered nurses [RNs] and physicians) working in the operating theatres, intensive care units and post anaesthesia care unit at anaesthetic clinics in the two

1  
2  
3 hospitals during spring 2011. The two hospitals were located in the same county council and  
4  
5 thus the clinics shared the same top management.  
6  
7  
8  
9

### 10 **Intervention**

11  
12 The decision to implement the communication tool SBAR at the clinic was taken by the  
13 management. Strategies to facilitate the implementation were: modifying a SBAR card, in-  
14 house training course, information material and observations during 7 months of the  
15 implementation period. A pocket SBAR card was slightly modified prior to implementation  
16 by a local inter-professional workgroup to adapt it to needs at the clinic. The intervention  
17 included an in-house training course (2.5 hours of instruction and role-playing) and  
18 implementation of the communication tool SBAR. During the introduction period May to  
19 September 2011, 155 of 194 (80%) staff were trained and the rest were offered continuous  
20 training. Informational material describing SBAR was distributed to all staff in the  
21 intervention group, who received the pocket card describing the SBAR structure to be used.  
22  
23 At the post anaesthesia care unit, the SBAR card was also attached to the patients' tables,  
24 where most handovers were conducted, and on the wall in the room where the physician's  
25 handovers were conducted. At the intensive care unit, a printed SBAR template was used for  
26 the receiver's notes during handovers. All staff members in the intervention group were  
27 encouraged to take part in the training course and to use the communication tool SBAR in  
28 their daily work. The period with an in-house training course was followed by a 7-month  
29 monitoring period, which consisted of 168 structured observations of handovers carried out  
30 by four members of the local inter-professional workgroup. The observations were used by  
31 management to monitor the intervention process and as feedback to the intervention group. In  
32 the comparison group, no structured communication system was used.  
33  
34  
35  
36  
37  
38  
39  
40  
41  
42  
43  
44  
45  
46  
47  
48  
49  
50  
51  
52  
53  
54  
55  
56  
57  
58  
59  
60



1  
2  
3 Manipulation check:

4  
5 Careful control of the implementation is required for interpretation of the findings.<sup>19</sup> To check  
6  
7 whether SBAR was implemented as intended, measures were made during a 7-month period  
8  
9 to follow the implementation. In the intervention group, structured telephone interviews were  
10  
11 conducted by one author (MR) with a random sample of 10 staff each month, except for one  
12  
13 month when only six staff members were reached. In total, 11 physicians, 17 intensive care  
14  
15 nurses, 10 anaesthesia nurse, 8 operating theatre nurses and 20 LPNs were interviewed.  
16  
17 Results showed that the majority of staff had taken the in-house training course and had used  
18  
19 the SBAR tool during the past seven working days.  
20  
21  
22  
23  
24  
25

## 26 **Data collection**

27  
28 Questionnaire data were collected prior to implementation of SBAR in April 2011 and at  
29  
30 follow-up 6 months after completion of the implementation period in October 2012. To  
31  
32 measure communication within and between different professions, the ICU Nurse-Physician  
33  
34 Questionnaire<sup>20</sup> was used, and the Safety Attitudes Questionnaire (SAQ)<sup>21</sup> was used to  
35  
36 measure staff members' attitudes toward six patient-safety-related domains. Spritzer's  
37  
38 empowerment scale<sup>22</sup> was used to measure psychological empowerment. Incident reports  
39  
40 were collected from the hospitals' registration systems during a 1-year period prior to (1 April  
41  
42 2010 to 31 March 2011) and after implementation of SBAR (1 April 2012 to 31 March 2013).  
43  
44  
45  
46  
47

48 Primary outcome measures:

49  
50 The *ICU Nurse-Physician Questionnaire* (short version, section one)<sup>23</sup> consists of five factors:  
51  
52 Within-group communication openness (4 items); Between-group communication openness  
53  
54 (4 items); Within-group communication accuracy (4 items); Between-group communication  
55  
56 accuracy (3 items); Communication timeliness (3 items). The original questionnaire was  
57  
58  
59  
60

1  
2  
3 created to address the relationship between nurses and physicians only. But because LPNs are  
4 a common staff group in Sweden, the questionnaire was adapted for LPNs and thus to suite  
5 Swedish working conditions. The term within-group communication means communication  
6 within the same profession (e.g. physician's perception of communicating with physician's)  
7 and the term between-group communication mean e.g. physician's perception of  
8 communicating with nurses and physician's perception of communicating with LPNs and so  
9 on. The items are answered in a 5-point Likert scale ranging from "Strongly Disagree" to  
10 "Strongly Agree." Negatively worded items are reversed before factor scores are averaged.  
11  
12 The ICU Nurse-Physician Questionnaire has shown satisfactory psychometric properties.  
13  
14 Cronbach's alpha values ( $\alpha$ ) for the five factors have been 0.64 to 0.88.<sup>20</sup> Translation of the  
15 questionnaire was conducted forward by the research team and back-translation was carried  
16 out by a bilingual translator.<sup>24</sup> In the present study,  $\alpha$ -values were between 0.68 and 0.88 at  
17 baseline and 0.68 and 0.85 at follow-up (Table 3).  
18  
19  
20  
21  
22  
23  
24  
25  
26  
27  
28  
29  
30  
31  
32  
33

34 The *Safety Attitudes Questionnaire* (SAQ, short form)<sup>21</sup> consists of six factors: Teamwork  
35 climate (6 items); Safety climate (7 items); Job satisfaction (5 items); Stress recognition (4  
36 items); Perceptions of management (6 items); Working conditions (3 items). The items are  
37 answered in a 5-point Likert scale ranging from "Disagree Strongly" to "Agree Strongly."  
38  
39 The negatively worded items are reversed and the scale is converted to a 0 - 100% scale  
40 where 0% = Disagree Strongly, 25% = Disagree Slightly, 50% = Neutral, 75% = Agree  
41 Slightly and 100% = Agree Strongly. The SAQ has shown satisfactory psychometric  
42 properties. Cronbach's  $\alpha$ -values have been between 0.70 and 0.85 for the factors.<sup>21</sup>  
43  
44 Translation of the questionnaire was conducted forward by the research team and back-  
45 translation was carried out by a bilingual translator.<sup>24</sup> In the present study,  $\alpha$ -values ranged  
46 from 0.71 to 0.85 at baseline and from 0.71 to 0.86 at follow-up for the factors (Table 3).  
47  
48  
49  
50  
51  
52  
53  
54  
55  
56  
57  
58  
59  
60

1  
2  
3 Secondary outcome measures:

4  
5 *Spreitzer's empowerment scale*<sup>25</sup> consists of four factors: Meaning (3 items); Competence (3  
6 items); Self-determination (3 items); Impact (3 items). The items are answered on a 7-point  
7 Likert scale ranging from "Strongly Disagree" to "Strongly Agree." Factor scores and the  
8 total scale are averaged. The Swedish version of the scale has shown satisfactory  
9 psychometric properties, with  $\alpha$ -values ranging from 0.77 to 0.90.<sup>22</sup> In the present study,  $\alpha$ -  
10 values ranged from 0.85 to 0.88 at baseline and from 0.80 to 0.87 at follow-up for the factors  
11 (Table 3).  
12  
13  
14  
15  
16  
17  
18  
19  
20  
21  
22

23 The number of *incident reports* was measured during a 1-year period prior to (1 April 2010 to  
24 31 March 2011) and after implementation of SBAR (1 April 2012 to 31 March 2013). In  
25 accordance with WHO definitions,<sup>26</sup> we defined incident reports as "A process used to  
26 document occurrences that are not consistent with routine hospital operation or patient care."  
27 A communication error is defined as "Missing or wrong information exchange or  
28 misinterpretation or misunderstanding."<sup>26</sup> In the county council where the present study was  
29 conducted, the clinic administrator has overall responsibility for incident reports. The incident  
30 reports are examined by an investigator who reviewed the cause of the incident and what  
31 measures were taken. The result of the investigation then goes back to the clinic, where  
32 possible follow-ups are carried out.  
33  
34  
35  
36  
37  
38  
39  
40  
41  
42  
43  
44  
45  
46  
47

#### 48 **Data analysis**

49 The data were analysed using descriptive statistics such as means, standard deviations [SD],  
50 absolute numbers and percentages. For within-group comparisons over time, the Wilcoxon  
51 Signed Rank Test was used, and for between-group comparisons the Mann-Whitney U-test  
52 was used. The Chi-square and Fisher's exact test were used to detect differences in the  
53  
54  
55  
56  
57  
58  
59  
60

1  
2  
3 frequency data. Factor scores in the three questionnaires were calculated if at least 66.7% of  
4  
5 the questions for each factor were answered. Internal consistency was calculated using  
6  
7 Cronbach's alpha. Non-parametric tests were used because the majority of factors did not  
8  
9 have a normal distribution. The level for statistical significance was set at  $p < 0.05$  (two-tailed).  
10  
11

### 12 13 14 **Ethical considerations**

15  
16 The study was approved (reg. no. 2011/061) by the Regional Ethical Review Board. All  
17  
18 participants received written information about the study aim and procedures and were told  
19  
20 that participation was strictly voluntary and could be discontinued at any time without  
21  
22 explanation.  
23  
24

## 25 26 27 28 29 **RESULTS**

### 30 31 32 **Sample characteristics**

33  
34 The response rate at baseline was 72% (n=139 of 194) in the intervention group and 75%  
35  
36 (n=91 of 122) in the comparison group. The response rate at follow-up in 2012 was 72%  
37  
38 (n=100 of 139) and 76% (n=69 of 91), respectively (Table 1). The drop-outs had fewer years  
39  
40 working in the profession ( $p=0.005$ ) fewer years working at the clinic ( $p < 0.001$ ) and higher  
41  
42 scores on the factor Teamwork climate ( $p=0.017$ ) and lower scores on the factor Competence  
43  
44 ( $p=0.048$ ) than the participants did. There were no statistically significant differences between  
45  
46 the intervention and comparison groups at baseline regarding age, sex, working years in the  
47  
48 profession, working years at the clinic and working time (Table 2). However, at baseline there  
49  
50 were statistically significant higher scores in the comparison group on five factors; Teamwork  
51  
52 climate ( $p=0.045$ ), Safety climate ( $p=0.002$ ), Job satisfaction ( $p=0.004$ ), Working condition  
53  
54 ( $p=0.002$ ) and Within-group communication accuracy ( $p=0.001$ ).  
55  
56  
57  
58  
59  
60

**Table 1.** Reasons for non-participants/dropouts at baseline and follow-up

| <b>Dropout</b>          | <b>Intervention group</b> | <b>Comparison group</b> |
|-------------------------|---------------------------|-------------------------|
| <i>Baseline</i>         | 194                       | 122                     |
| Refusal                 | 3                         | 24                      |
| No reason               | 52                        | 7                       |
| Answered questionnaires | 139                       | 91                      |
| <i>Follow-up</i>        | 139                       | 91                      |
| Parental leave          | 3                         | 2                       |
| Changed workplace       | 3                         | 1                       |
| Long-term illness       | -                         | 1                       |
| Retired                 | 1                         | 1                       |
| Quit work               | 3                         | 6                       |
| Leave of absence        | 5                         | 1                       |
| Education               | 2                         | 1                       |
| Total unavailable staff | 17                        | 13                      |
| Eligible staff          | 122                       | 78                      |
| Refusal                 | 6                         | 6                       |
| No reason               | 16                        | 3                       |
| Answered questionnaires | 100                       | 69                      |

**Table 2.** Demographic data on staff members in the intervention group and control group who participated at baseline and follow-up. Mean (m), Standard deviation (SD), numbers (n) and percent (%)

|                                 | Intervention group<br>(n=100) | Comparison group<br>(n=69) | P-value |
|---------------------------------|-------------------------------|----------------------------|---------|
| Age, years, m (SD)              | 48.2 (8.7)                    | 48.6 (9.0)                 | 0.780   |
| Sex male/female, n              | 15 (15%)/85 (85%)             | 11 (16%)/58 (84%)          | 1.000   |
| Profession, n                   |                               |                            | 0.945   |
| - LPN                           | 27 (27%)                      | 18 (26%)                   |         |
| - RN                            | 63 (63%)                      | 43 (62%)                   |         |
| - Physician                     | 10 (10%)                      | 8 (12%)                    |         |
| Years in the profession, m (SD) | 17.5 (11.2)                   | 19.5 (10.2)                | 0.257   |
| Years at the clinic, m (SD)     | 15.2 (11.0)                   | 15.4 (10.3)                | 0.883   |
| Working full-time/part-time, n  | 60 (60%)/40 (40%)             | 48 (70%)/21 (30%)          | 0.254   |

Independent Samples T-test and Chi-square Test. The significant level is 0.05

LPN = Licensed Practical Nurse, RN = Registered Nurse

### Primary outcome

Of the five factors in the ICU Nurse-Physician Questionnaire, the factor Between-group communication accuracy improved significantly ( $p=0.001$ ) over time in the intervention group. For the factor Within-group communication accuracy, there was a tendency for improvement over time in the intervention group, though it was not statistically significant ( $p=0.076$ ). This finding required further investigation, and we proceeded by analyzing each

1  
2  
3 item. There was significant improvement over time for the item “It is often necessary for me  
4 to go back and check the accuracy of information I have received from [physicians, nurses or  
5 licensed practical nurses] in this unit” ( $p=0.025$ ). In the comparison group, the factor  
6  
7  
8  
9  
10 Between-group openness improved significantly ( $p=0.039$ ) over time. When changes over  
11 time were compared between the intervention group and comparison group, the results  
12 showed no statistically significant differences (Table 3). Of the factors in the SAQ, the factor  
13  
14 Safety climate improved significantly ( $p=0.011$ ) over time in the intervention group. For the  
15  
16 other factors in the SAQ, there were no statistically significant differences. In the comparison  
17  
18  
19 group, the factor Perception of management at the unit showed a significant ( $p<0.001$ )  
20  
21 improvement over time, as did the factor Working condition ( $p=0.029$ ). When changes over  
22  
23 time were compared between the intervention group and comparison group, the results  
24  
25 showed a significant difference ( $p<0.001$ ) between groups for the factor Perception of  
26  
27 management at the unit. For the factor Safety climate, the p-value was 0.087 when change  
28  
29 over time between the groups was compared (Table 3).  
30  
31  
32  
33  
34  
35

### 36 **Secondary outcome**

37  
38 In the intervention group, the number of incident reports during a 1-year period prior to  
39  
40 implementation was 116, whereof 36 (31%) were due to communication errors. The same  
41  
42 year, in the comparison group, 6 of the 24 (25%) registered incident reports were due to  
43  
44 communication errors. In the intervention group, during a 1-year period after implementation,  
45  
46 the incident reports due to communication errors had decreased to 23 of a total of 208 (11%).  
47  
48 During the same period in the comparison group, the number of incident reports due to  
49  
50 communication errors was 6 of 32 (19%). The decrease in the proportions of incident reports  
51  
52 due to communication errors in the intervention group was statistically significant ( $p<0.0001$ ),  
53  
54 though it was not in the comparison group ( $p=0.744$ ). Regarding psychological  
55  
56  
57  
58  
59  
60

1  
2  
3 empowerment, the results revealed no statistically significant changes over time in either the  
4  
5 intervention group or the comparison group (Table 3).  
6  
7  
8  
9  
10  
11  
12  
13  
14  
15  
16  
17  
18  
19  
20  
21  
22  
23  
24  
25  
26  
27  
28  
29  
30  
31  
32  
33  
34  
35  
36  
37  
38  
39  
40  
41  
42  
43  
44  
45  
46  
47  
48  
49  
50  
51  
52  
53  
54  
55  
56  
57  
58  
59  
60

For peer review only

**Table 3.** Staff members' assessment of communication within and between groups, safety attitudes and empowerment in the intervention and comparison group at baseline and follow-up as change over time between groups. Mean and Standard deviation (SD), n = 169.

| Measurement factors                         | Cronbach's alpha | Intervention group<br>- Within group |                      | Comparison group<br>- Within group |                      | Change over time between groups<br><sup>2</sup> p-value |
|---------------------------------------------|------------------|--------------------------------------|----------------------|------------------------------------|----------------------|---------------------------------------------------------|
|                                             |                  | <sup>1</sup> Mean value (SD)         | <sup>1</sup> p-value | <sup>1</sup> Mean value (SD)       | <sup>1</sup> p-value |                                                         |
| <b>ICU Nurse-Physician Questionnaire</b>    |                  |                                      |                      |                                    |                      |                                                         |
| <i>Within-group communication openness</i>  |                  |                                      |                      |                                    |                      |                                                         |
| Baseline                                    | 0.80             | 4.3 (0.6)                            |                      | 4.4 (0.6)                          |                      |                                                         |
| Follow-up                                   | 0.78             | 4.3 (0.5)                            | 0.998                | 4.4 (0.5)                          | 0.529                | 0.390                                                   |
| <i>Between-group communication openness</i> |                  |                                      |                      |                                    |                      |                                                         |
| Baseline                                    |                  |                                      |                      |                                    |                      |                                                         |
| Physician↔RN; LPN↔Physician; RN↔LPN         | 0.82; 0.88; 0.84 | 4.3 (0.5)                            |                      | 4.2 (0.6)                          |                      |                                                         |
| Follow-up                                   |                  |                                      |                      |                                    |                      |                                                         |
| Physician↔RN; LPN↔Physician; RN↔LPN         | 0.85; 0.84; 0.82 | 4.3 (0.5)                            | 0.686                | 4.3 (0.6)                          | <b>0.039</b>         | 0.263                                                   |
| <i>Within-group communication accuracy</i>  |                  |                                      |                      |                                    |                      |                                                         |
| Baseline                                    | 0.73             | 3.3 (0.8)                            |                      | 3.7 (0.8)                          |                      |                                                         |
| Follow-up                                   | 0.75             | 3.4 (0.8)                            | 0.076                | 3.7 (0.9)                          | 0.966                | 0.371                                                   |
| <i>Between-group communication accuracy</i> |                  |                                      |                      |                                    |                      |                                                         |
| Baseline                                    |                  |                                      |                      |                                    |                      |                                                         |
| Physician↔RN; LPN↔Physician; RN↔LPN         | 0.69; 0.68; 0.77 | 3.3 (0.8)                            |                      | 3.5 (0.8)                          |                      |                                                         |
| Follow-up                                   |                  |                                      |                      |                                    |                      |                                                         |
| Physician↔RN; LPN↔Physician; RN↔LPN         | 0.77; 0.69; 0.76 | 3.5 (0.8)                            | <b>0.001</b>         | 3.6 (0.8)                          | 0.185                | 0.172                                                   |
| <i>Communication timeliness</i>             |                  |                                      |                      |                                    |                      |                                                         |
| Baseline                                    | 0.74             | 4.2 (0.7)                            |                      | 4.2 (0.7)                          |                      |                                                         |
| Follow-up                                   | 0.68             | 4.3 (0.6)                            | 0.612                | 4.3 (0.7)                          | 0.650                | 0.958                                                   |
| <b>Safety Attitudes Questionnaire</b>       |                  |                                      |                      |                                    |                      |                                                         |
| <i>Teamwork climate</i>                     |                  |                                      |                      |                                    |                      |                                                         |
| Baseline                                    | 0.73             | 72.2 (15.1)                          |                      | 76.9 (15.1)                        |                      |                                                         |
| Follow-up                                   | 0.74             | 73.8 (14.4)                          | 0.350                | 76.7 (15.8)                        | 0.914                | 0.584                                                   |
| <i>Safety climate</i>                       |                  |                                      |                      |                                    |                      |                                                         |
| Baseline                                    | 0.76             | 63.1 (15.8)                          |                      | 70.3 (14.3)                        |                      |                                                         |
| Follow-up                                   | 0.78             | 66.4 (16.2)                          | <b>0.011</b>         | 70.2 (16.0)                        | 0.949                | 0.087                                                   |
| <i>Job satisfaction</i>                     |                  |                                      |                      |                                    |                      |                                                         |



|                                      |      |             |       |             |                  |                  |
|--------------------------------------|------|-------------|-------|-------------|------------------|------------------|
| Baseline                             | 0.85 | 75.3 (15.5) |       | 81.5 (16.4) |                  |                  |
| Follow-up                            | 0.86 | 74.2 (15.4) | 0.604 | 81.7 (15.0) | 0.865            | 0.771            |
| <i>Stress recognition</i>            |      |             |       |             |                  |                  |
| Baseline                             | 0.85 | 68.0 (21.9) |       | 65.8 (25.2) |                  |                  |
| Follow-up                            | 0.82 | 67.8 (20.8) | 0.483 | 63.5 (24.9) | 0.382            | 0.388            |
| <i>Perception of management unit</i> |      |             |       |             |                  |                  |
| Baseline                             | 0.76 | 60.2 (17.9) |       | 59.2 (16.7) |                  |                  |
| Follow-up                            | 0.80 | 60.2 (18.6) | 0.667 | 68.6 (16.7) | <b>&lt;0.001</b> | <b>&lt;0.001</b> |
| <i>Working condition</i>             |      |             |       |             |                  |                  |
| Baseline                             | 0.71 | 63.9 (19.2) |       | 73.3 (15.6) |                  |                  |
| Follow-up                            | 0.71 | 63.5 (18.8) | 0.956 | 77.8 (16.2) | <b>0.029</b>     | 0.131            |
| <b>Spreitzer's Empowerment scale</b> |      |             |       |             |                  |                  |
| <i>Meaning</i>                       |      |             |       |             |                  |                  |
| Baseline                             | 0.86 | 6.2 (0.8)   |       | 6.3 (0.9)   |                  |                  |
| Follow-up                            | 0.86 | 6.3 (0.7)   | 0.270 | 6.3 (0.8)   | 0.935            | 0.602            |
| <i>Competence</i>                    |      |             |       |             |                  |                  |
| Baseline                             | 0.86 | 6.4 (0.7)   |       | 6.5 (0.6)   |                  |                  |
| Follow-up                            | 0.80 | 6.4 (0.6)   | 0.985 | 6.5 (0.7)   | 0.877            | 0.818            |
| <i>Self-determination</i>            |      |             |       |             |                  |                  |
| Baseline                             | 0.86 | 4.3 (1.2)   |       | 4.4 (1.5)   |                  |                  |
| Follow-up                            | 0.86 | 4.3 (1.3)   | 0.992 | 4.6 (1.3)   | 0.342            | 0.465            |
| <i>Impact</i>                        |      |             |       |             |                  |                  |
| Baseline                             | 0.88 | 4.2 (1.3)   |       | 4.5 (1.4)   |                  |                  |
| Follow-up                            | 0.87 | 4.2 (1.4)   | 0.639 | 4.5 (1.3)   | 0.867            | 0.857            |
| <i>Empowerment total factors</i>     |      |             |       |             |                  |                  |
| Baseline                             | 0.85 | 5.3 (0.7)   |       | 5.4 (0.8)   |                  |                  |
| Follow-up                            | 0.86 | 5.3 (0.8)   | 0.474 | 5.5 (0.7)   | 0.444            | 0.916            |

<sup>1</sup>Wilcoxon Signed Rank Test and <sup>2</sup>Mann-Whitney U-test. The significant level is 0.05 and statistical significant results are marked with boldface text  
 LPN = Licensed Practical Nurse, RN = Registered Nurse

## DISCUSSION

SBAR is thought to facilitate communication between professions and increase safety as well as to decrease the negative effects the professional hierarchy may have on communication.

Our results showed that implementation of the communication tool SBAR resulted in significant improvement over time in staff members' perceptions of Between-group communication accuracy and Safety climate as well as a tendency toward improvement in Within-group communication accuracy. Furthermore, the proportion of incident reports due to communication errors decreased significantly, from 31% (36 of 116) to 11% (23 of 208), in the intervention group compared with a non-significant decrease, from 25% (6 of 24) to 19% (6 of 32), in the comparison group. Thus, in the intervention group safety reporting seemed to improve but the proportion of incident reports due to communication decreased significantly.

The improvement in staff members' perceptions of Between-group communication accuracy after implementation of the communication tool SBAR seen in the present study is similar to findings from a study by DeMeester<sup>16</sup>, where nurse-physician communication also improved. In a study by Manojlovich and DeCicco<sup>27</sup> Between-group communication was shown to be a significant predictor of perceived medication error<sup>27</sup>. Nurses and physicians are trained to express themselves in different ways<sup>28</sup> and communication between different professions is known to be a contributing factor in surgical malpractice claims.<sup>1</sup> Because staff members' perceptions of Between-group communication accuracy improved, it would seem that SBAR was able to bridge differences in style of communication.

Safety climate also improved, and the proportion of incident reports due to communication errors decreased in the intervention group, which may indicate that safety performance

1  
2  
3 improved. One study<sup>29</sup> of 91 hospitals found that a higher level of safety climate was  
4  
5 associated with higher safety performance at the hospital level. Furthermore, Huang *et al.*  
6  
7 (2010)<sup>30</sup> studied 30 ICUs in the US using SAQ and found that lower Safety climate was  
8  
9 associated with patient outcomes such as increased hospital length of stay. However, another  
10  
11 study by Rosen *et al.* (2010)<sup>31</sup> failed to show a relationship between safety climate and  
12  
13 hospital safety performance. As in the present study, improved perception of safety climate  
14  
15 has also been found in studies<sup>11 12</sup> of rehabilitation settings in which SBAR had been  
16  
17 implemented. Verbal communication errors were found to be an important cause of severe  
18  
19 patient safety incidents.<sup>32</sup> In the present study, there was a decrease in the proportion of  
20  
21 incident reports due to communication errors. According to the present results, one can  
22  
23 assume that SBAR made communication safer, resulting in a decrease in incident reports due  
24  
25 to communication errors. This interpretation is also in line with our hypothesis. We also  
26  
27 hypothesized that a secondary outcome of implementing SBAR could be an increase in staff  
28  
29 members' perception of psychological empowerment. In the present study, it would seem  
30  
31 reasonable to assume that SBAR training should have increased staff members'  
32  
33 empowerment, but no such effect was found during the study period.  
34  
35  
36  
37  
38  
39  
40

41 In the comparison group, there were no significant changes in staff members' perceptions of  
42  
43 Communication accuracy or Safety climate. However, the factors Between-group  
44  
45 communication openness, Perception of management at the unit and Working condition  
46  
47 improved significantly over time. During the period between baseline and follow-up, there  
48  
49 were work-related changes in the comparison group that may have affected the results. The  
50  
51 staff in the operating theatre had increased in size, and there had been discussions of the  
52  
53 importance of collaboration at the intensive care unit. **When working condition is improved  
54  
55 one can expect that also communication improves.**  
56  
57  
58  
59  
60

### Strengths and weaknesses of the study

The strengths of the present study were that measures of both safety culture and the number of incident reports related to communication were included, as previously recommended,<sup>18</sup> and that a comparison group was used. Furthermore, during 7 months of the implementation period, we followed the implementation using a manipulation check involving randomized structured telephone interviews. An additional support in the implementation was observations of handovers conducted by the local inter-professional workgroup. In a simulation study, low adherence was found for use of SBAR during a 1-year period after implementation in a hospital.<sup>17</sup> In the present study, the manipulation check and observations showed that SBAR was in use at the clinic. One other strength is that the questionnaires used have shown satisfactory psychometric properties, and Cronbach's Alpha values in the present study for all instruments, total scale and factors were over 0.68. Although the two groups were different in size, there were no significant differences in the demographic data. The distribution was not normal and a limitation was that it was not possible to do multivariate analysis to correct for the differences at baseline in some variables as "Between-group communication openness", Perception of management unit" and "Working conditions". The response rate was satisfying, exceeding 70% at both baseline and follow-up in the two groups. When interpreting the present results, possible threats to internal validity should be considered. First, the very nature of the quasi-experimental design entailed selection biases: The participants were not randomly assigned and there were statistically significant differences between the intervention group and the comparison group at baseline. Although the comparison group had higher baseline levels on the five factors that could have affected the results, there was still room for improvement. Second, the loss of subjects poses another threat to internal validity, in that the drop-outs had statistically higher scores on the factor Teamwork climate and statistically lower scores on the factor Competence than the

1  
2  
3 participants did. On the other hand, the number of drop-outs was moderate. There were also  
4  
5 differences in incident reporting. The comparison group had overall lower frequency of  
6  
7 registered incident reports. There may be several reasons for this, e.g. that the frequency of  
8  
9 incidents was actually different or that there was a difference in the tendency to report  
10  
11 incidents. Third, an additional threat to internal validity was that there may have been some  
12  
13 diffusion of the intervention to the comparison group, which could have affected the results.  
14  
15 Further research dealing with these methodological issues is needed to confirm our results.  
16  
17  
18  
19

## 20 21 **Conclusion**

22  
23 Implementing the communication tool SBAR in anaesthetic care can improve communication  
24  
25 between professionals, improve the safety climate and reduce incidents caused by  
26  
27 communication errors.  
28  
29  
30  
31

32  
33 **Contributors** All authors (MR, GM, CLS and ME) contributed to the design, interpreted  
34  
35 data, drafted and revised the article critically. Data analysis was conducted by MR and ME.  
36  
37 MR collected data, conducted the manipulation check and wrote the manuscript under the  
38  
39 supervision of GM, CLS and ME. All authors read and approved the final version of the  
40  
41 paper.  
42  
43

44  
45 **Funding** This work was supported by the Faculty of Health and Occupational Studies,  
46  
47 University of Gävle and by the County Council Gävleborg. It was also supported by the  
48  
49 Patient Insurance LÖF and the Swedish Society of Nursing, but these organizations had no  
50  
51 role in the design and running of the study.  
52

53  
54 **Competing Interests** None declared.  
55  
56  
57  
58  
59  
60

1  
2  
3  
4  
5  
6  
7  
8  
9  
10  
11  
12  
13  
14  
15  
16  
17  
18  
19  
20  
21  
22  
23  
24  
25  
26  
27  
28  
29  
30  
31  
32  
33  
34  
35  
36  
37  
38  
39  
40  
41  
42  
43  
44  
45  
46  
47  
48  
49  
50  
51  
52  
53  
54  
55  
56  
57  
58  
59  
60

**Ethics approval** The Regional Ethical Review Board (reg. no. 2011/061).

**Data sharing statement** There is no additional data available for data sharing.

For peer review only

## REFERENCES

1. Greenberg CC, Regenbogen SE, Studdert DM, *et al.* Patterns of communication breakdowns resulting in injury to surgical patients. *J Am Coll Surg* 2007;**204**:533-40.
2. Lingard L, Espin S, Whyte S, *et al.* Communication failures in the operating room: an observational classification of recurrent types and effects. *Qual Saf Health Care* 2004;**13**:330-4.
3. Wiegmann DA, ElBardissi AW, Dearani JA, *et al.* Disruptions in surgical flow and their relationship to surgical errors: an exploratory investigation. *Surgery* 2007; **142**:658-65.
4. White AA, Pichert JW, Bledsoe SH, *et al.* Cause and effect analysis of closed claims in obstetrics and gynecology. *Obstet Gynecol* 2005;**105**:1031-8.
5. WHO Patient Safety Solutions| volume 1, solution 3 | May 2007 Available at:  
[http://www.refworks.com/refgrabit/rw2linkpage.aspx?subscriber=6107&user=1209&\\_id=1344860455630](http://www.refworks.com/refgrabit/rw2linkpage.aspx?subscriber=6107&user=1209&_id=1344860455630).  
Accessed 13/8/2012
6. Leonard M, Graham S, Bonacum D. The human factor: the critical importance of effective teamwork and communication in providing safe care. *Qual Saf Health Care* 2004;**13** Suppl 1:i85-90.
7. Flemming D, Hubner U. How to improve change of shift handovers and collaborative grounding and what role does the electronic patient record system play? Results of a systematic literature review. *Int J Med Inform* 2013;**82**:580-92.
8. Renz SM, Boltz MP, Wagner LM, *et al.* Examining the feasibility and utility of an SBAR protocol in long-term care. *Geriatr Nurs* 2013; **34**:295-301.
9. Compton J, Copeland K, Flanders S, *et al.* Implementing SBAR across a large multihospital health system. *Jt Comm J Qual Patient Saf* 2012;**38**:261-8.
10. Telem DA, Buch KE, Ellis S, *et al.* Integration of a formalized handoff system into the surgical curriculum: resident perspectives and early results. *Arch Surg* 2011; Jan;**146**:89-93.

- 1  
2  
3 11. Velji K, Baker GR, Fancott C, *et al.* Effectiveness of an Adapted SBAR Communication Tool for a  
4  
5  
6  
7  
8  
9  
10  
11  
12  
13  
14  
15  
16  
17  
18  
19  
20  
21  
22  
23  
24  
25  
26  
27  
28  
29  
30  
31  
32  
33  
34  
35  
36  
37  
38  
39  
40  
41  
42  
43  
44  
45  
46  
47  
48  
49  
50  
51  
52  
53  
54  
55  
56  
57  
58  
59  
60  
21. Sexton JB, Helmreich RL, Neilands TB, *et al.* The Safety Attitudes Questionnaire: psychometric properties,  
benchmarking data, and emerging research. *BMC Health Serv Res* 2006; **6**:44.



- 1  
2  
3 22. Hochwalder J, Bergsten Brucefors A. A psychometric assessment of a Swedish translation of Spreitzer's  
4 empowerment scale. *Scand J Psychol* 2005; **46**:521-9.  
5  
6  
7  
8 23. The organization and management of intensive care units. Copyright 1989. Available at:  
9 <http://shortellresearch.berkeley.edu/ICU.htm>. Accessed 24/9/2013.  
10  
11  
12 24. Maneesriwongul W, Dixon JK. Instrument translation process: a methods review. *J Adv Nurs* 2004; **48**:175-  
13 86.  
14  
15  
16  
17 25. Spreitzer GM. Psychological empowerment in the workplace: Dimensions, measurement, and validation.  
18 *Academy of Management Journal* 1995;**38**:1442-65.  
19  
20  
21  
22 26. WHO Conceptual framework for the international classification for patient safety. Januari 2009. Available  
23 at: <http://www.who.int/patientsafety/implementation/taxonomy/publications/en/index.html>. Accessed 9/24/2013,  
24 2013.  
25  
26  
27  
28  
29 27. Manojlovich M, DeCicco B. Healthy work environments, nurse-physician communication, and patients'  
30 outcomes. *Am J Crit Care* 2007; **16**:536-43.  
31  
32  
33  
34 28. Greenfield LJ. Doctors and nurses: a troubled partnership. *Ann Surg* 1999;**230**:279-88.  
35  
36  
37 29. Singer S, Lin S, Falwell A, Gaba D, *et al*. Relationship of safety climate and safety performance in hospitals.  
38 *Health Serv Res* 2009; **44**:399-421.  
39  
40  
41 30. Huang DT, Clermont G, Kong L, *et al*. Intensive care unit safety culture and outcomes: a US multicenter  
42 study. *Int J Qual Health Care* 2010; **22**:151-61.  
43  
44  
45  
46 31. Rosen AK, Singer S, Shibe Z, *et al*. Hospital safety climate and safety outcomes: is there a relationship in  
47 the VA?. *Med Care Res Rev* 2010; **67**:590-608.  
48  
49  
50  
51 32. Rabol LI, Andersen ML, Ostergaard D, *et al*. Descriptions of verbal communication errors between staff. An  
52 analysis of 84 root cause analysis-reports from Danish hospitals. *BMJ Qual Saf* 2011; **20**:268-74.  
53  
54  
55  
56  
57  
58  
59  
60

1  
2  
3  
4  
5  
6  
7  
8  
9  
10  
11  
12  
13  
14  
15  
16  
17  
18  
19  
20  
21  
22  
23  
24  
25  
26  
27  
28  
29  
30  
31  
32  
33  
34  
35  
36  
37  
38  
39  
40  
41  
42  
43  
44  
45  
46  
47  
48  
49  
50  
51  
52  
53  
54  
55  
56  
57  
58  
59  
60

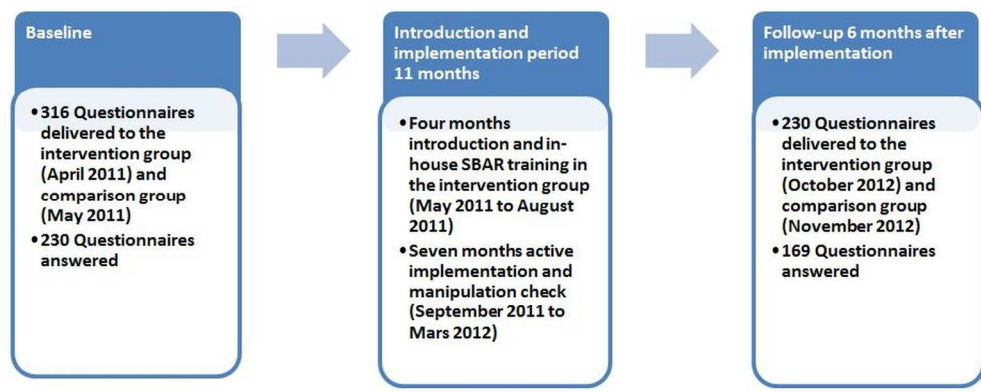

211x90mm (300 x 300 DPI)

Peer review only
